# Supplementary material for: The synthesis of the very long chain polyunsaturated fatty acid (VLC-PUFA) 32:6 n-3
Source: Royal Society of Chemistry journal article supplement (doi:10.1039/d1ob00491c), 2021-01-01

## The Synthesis of the Very Long Chain Polyunsaturated Fatty Acid (VLC-PUFA) 32:6 n-3

Alexander Wade,<sup>a</sup> Rameshu Rallabandi,<sup>a</sup> Steven Lucas,<sup>a</sup> Catrina Oberg,<sup>a</sup> Aruna Gorusupudi,<sup>b</sup> Paul S. Bernstein,<sup>b</sup>  
and Jon D. Rainier<sup>\*a</sup>

<sup>a</sup>Department of Chemistry, University of Utah, Salt Lake City, UT 84112

<sup>b</sup>Department of Ophthalmology and Visual Sciences, 65 Mario Capecchi Drive, Moran Eye  
Center, University of Utah, Salt Lake City, UT 84132

### Contents

|                                      |     |                                      |     |
|--------------------------------------|-----|--------------------------------------|-----|
| 1. <b>1</b> ( <sup>1</sup> H NMR)    | S2  | 22. <b>S3</b> ( <sup>13</sup> C NMR) | S23 |
| 2. <b>1</b> ( <sup>13</sup> C NMR)   | S3  | 23. <b>12</b> ( <sup>1</sup> H NMR)  | S24 |
| 3. <b>S1</b> ( <sup>1</sup> H NMR)   | S4  | 24. <b>12</b> ( <sup>13</sup> C NMR) | S25 |
| 4. <b>S1</b> ( <sup>13</sup> C NMR)  | S5  | 25. <b>S4</b> ( <sup>1</sup> H NMR)  | S26 |
| 5. <b>2</b> ( <sup>1</sup> H NMR)    | S6  | 26. <b>S4</b> ( <sup>13</sup> C NMR) | S27 |
| 6. <b>2</b> ( <sup>13</sup> C NMR)   | S7  | 27. <b>S5</b> ( <sup>1</sup> H NMR)  | S28 |
| 7. <b>6</b> ( <sup>1</sup> H NMR)    | S8  | 28. <b>S5</b> ( <sup>13</sup> C NMR) | S29 |
| 8. <b>6</b> ( <sup>13</sup> C NMR)   | S9  | 29. <b>13</b> ( <sup>1</sup> H NMR)  | S30 |
| 9. <b>7</b> ( <sup>1</sup> H NMR)    | S10 | 30. <b>13</b> ( <sup>13</sup> C NMR) | S31 |
| 10. <b>7</b> ( <sup>13</sup> C NMR)  | S11 | 31. <b>S6</b> ( <sup>1</sup> H NMR)  | S32 |
| 11. <b>8</b> ( <sup>1</sup> H NMR)   | S12 | 32. <b>S6</b> ( <sup>13</sup> C NMR) | S33 |
| 12. <b>8</b> ( <sup>13</sup> C NMR)  | S13 | 33. <b>14</b> ( <sup>1</sup> H NMR)  | S34 |
| 13. <b>9</b> ( <sup>1</sup> H NMR)   | S14 | 34. <b>14</b> ( <sup>13</sup> C NMR) | S35 |
| 14. <b>9</b> ( <sup>13</sup> C NMR)  | S15 |                                      |     |
| 15. <b>S2</b> ( <sup>1</sup> H NMR)  | S16 |                                      |     |
| 16. <b>S2</b> ( <sup>13</sup> C NMR) | S17 |                                      |     |
| 17. <b>10</b> ( <sup>1</sup> H NMR)  | S18 |                                      |     |
| 18. <b>10</b> ( <sup>13</sup> C NMR) | S19 |                                      |     |
| 19. <b>11</b> ( <sup>1</sup> H NMR)  | S20 |                                      |     |
| 20. <b>11</b> ( <sup>13</sup> C NMR) | S21 |                                      |     |
| 21. <b>S3</b> ( <sup>1</sup> H NMR)  | S22 |                                      |     |





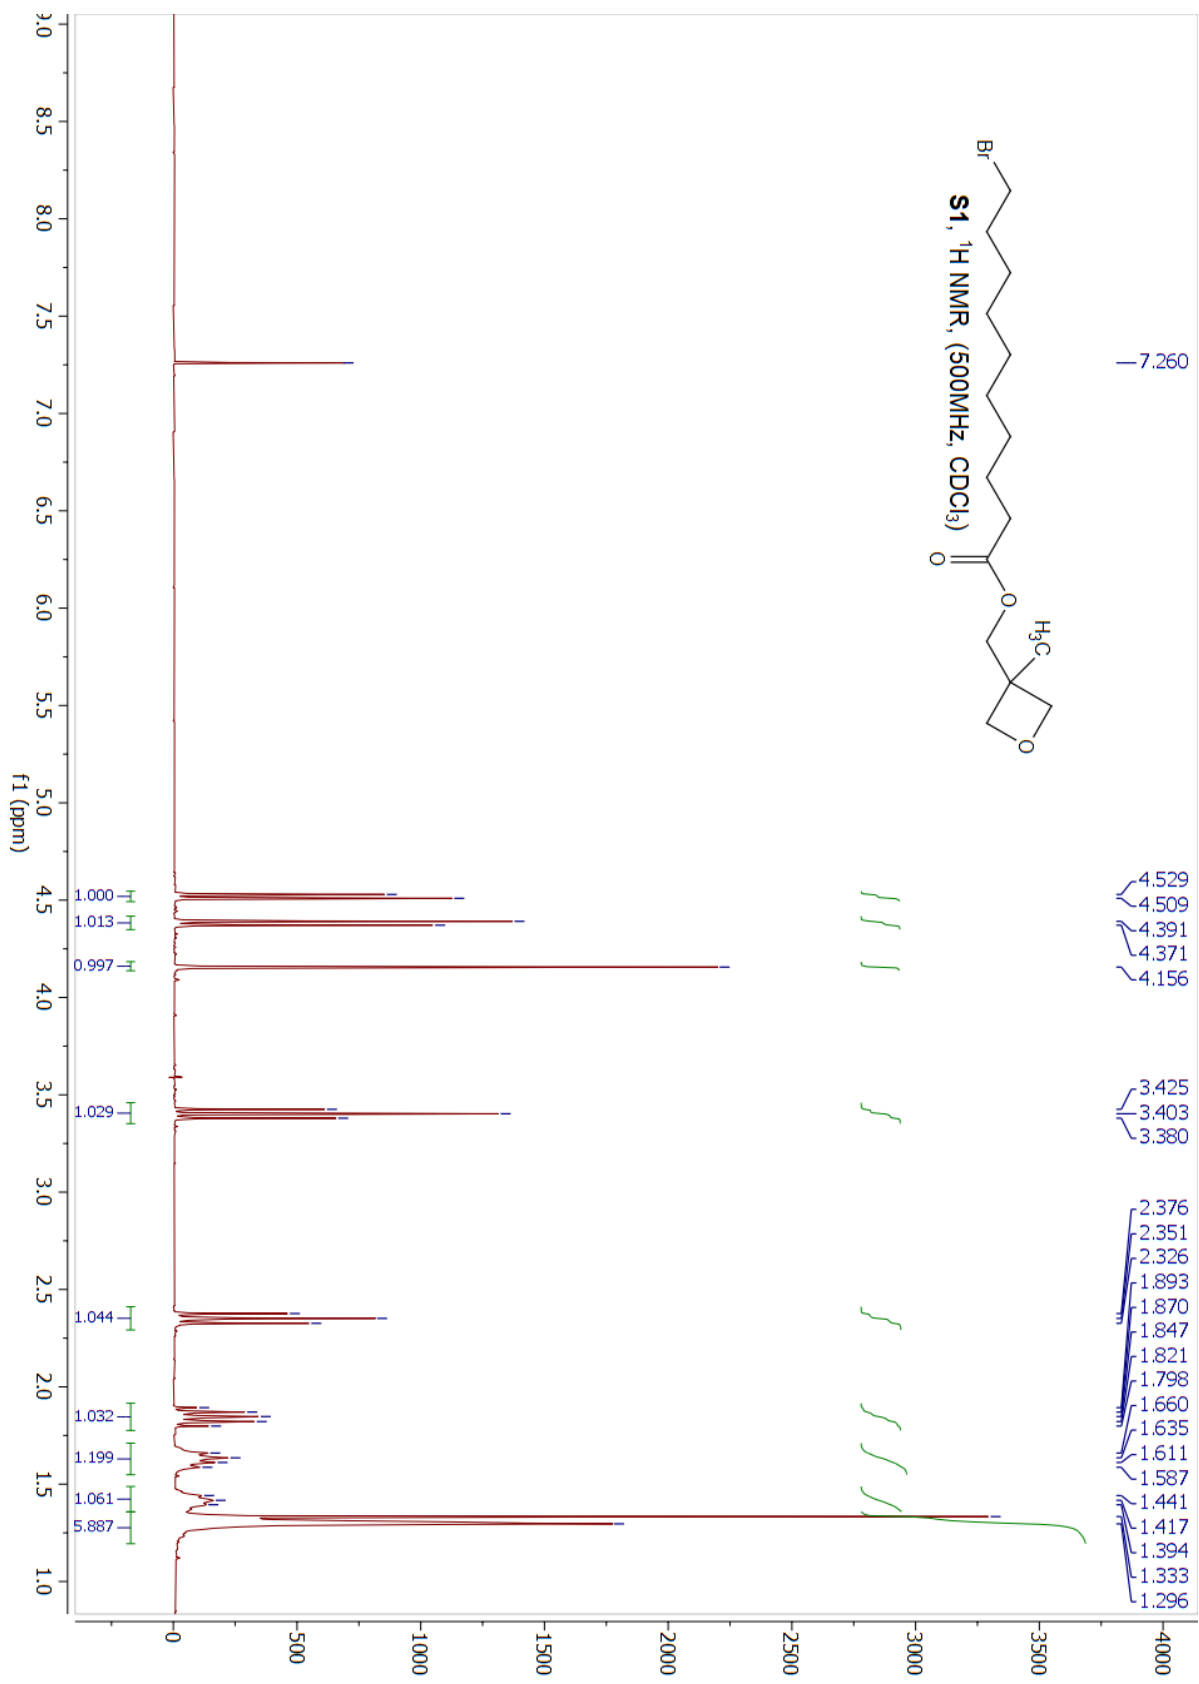

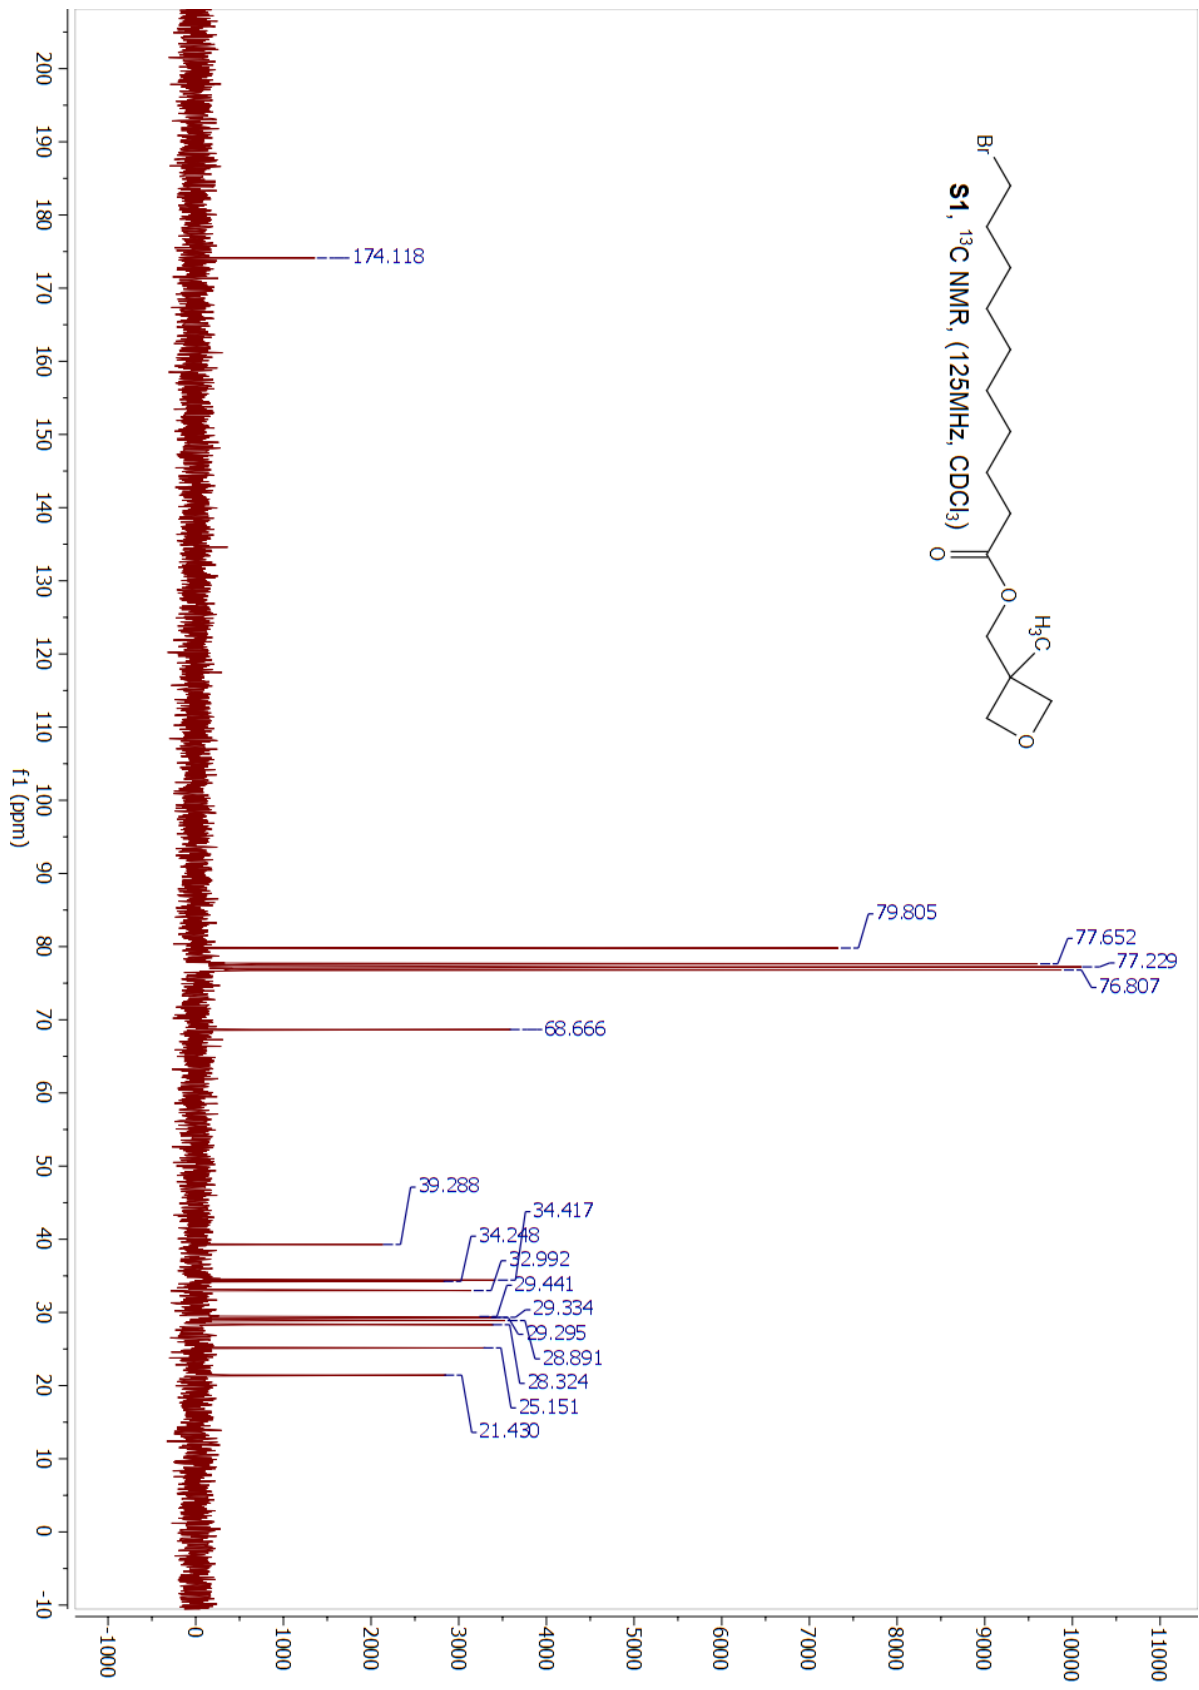

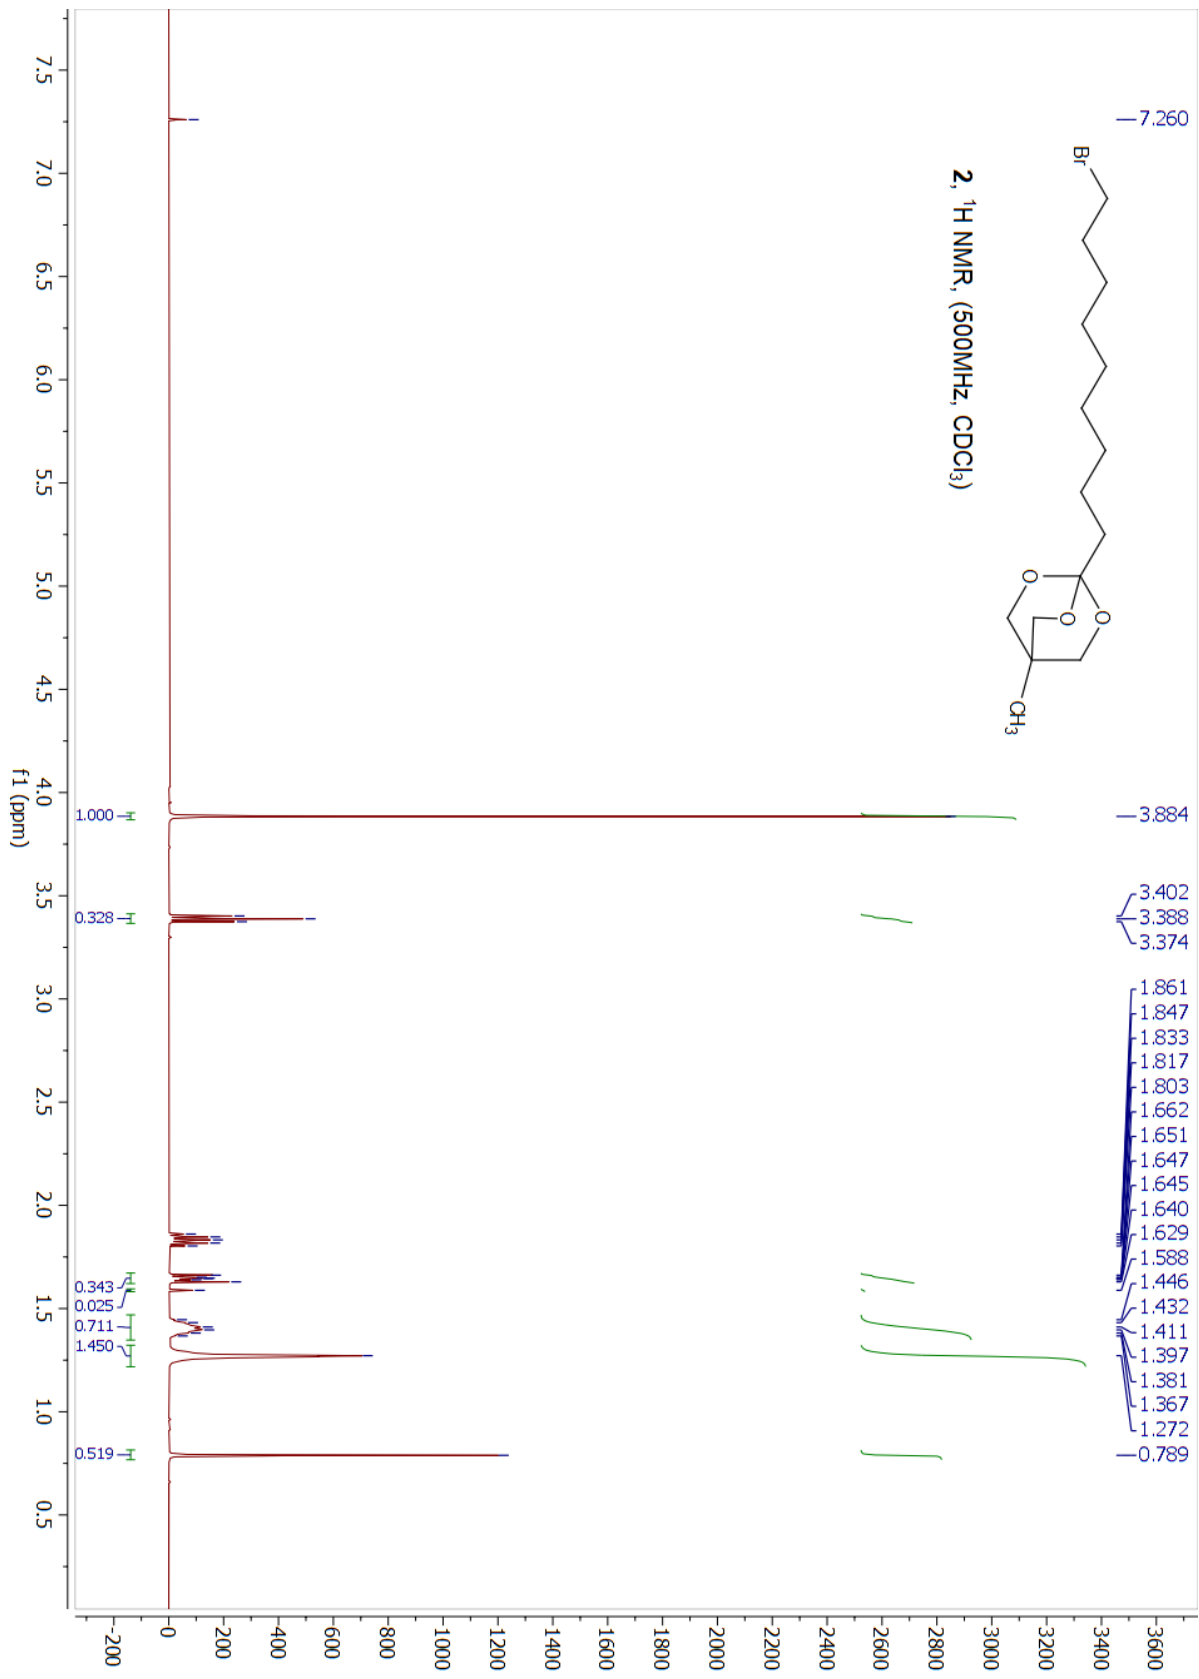

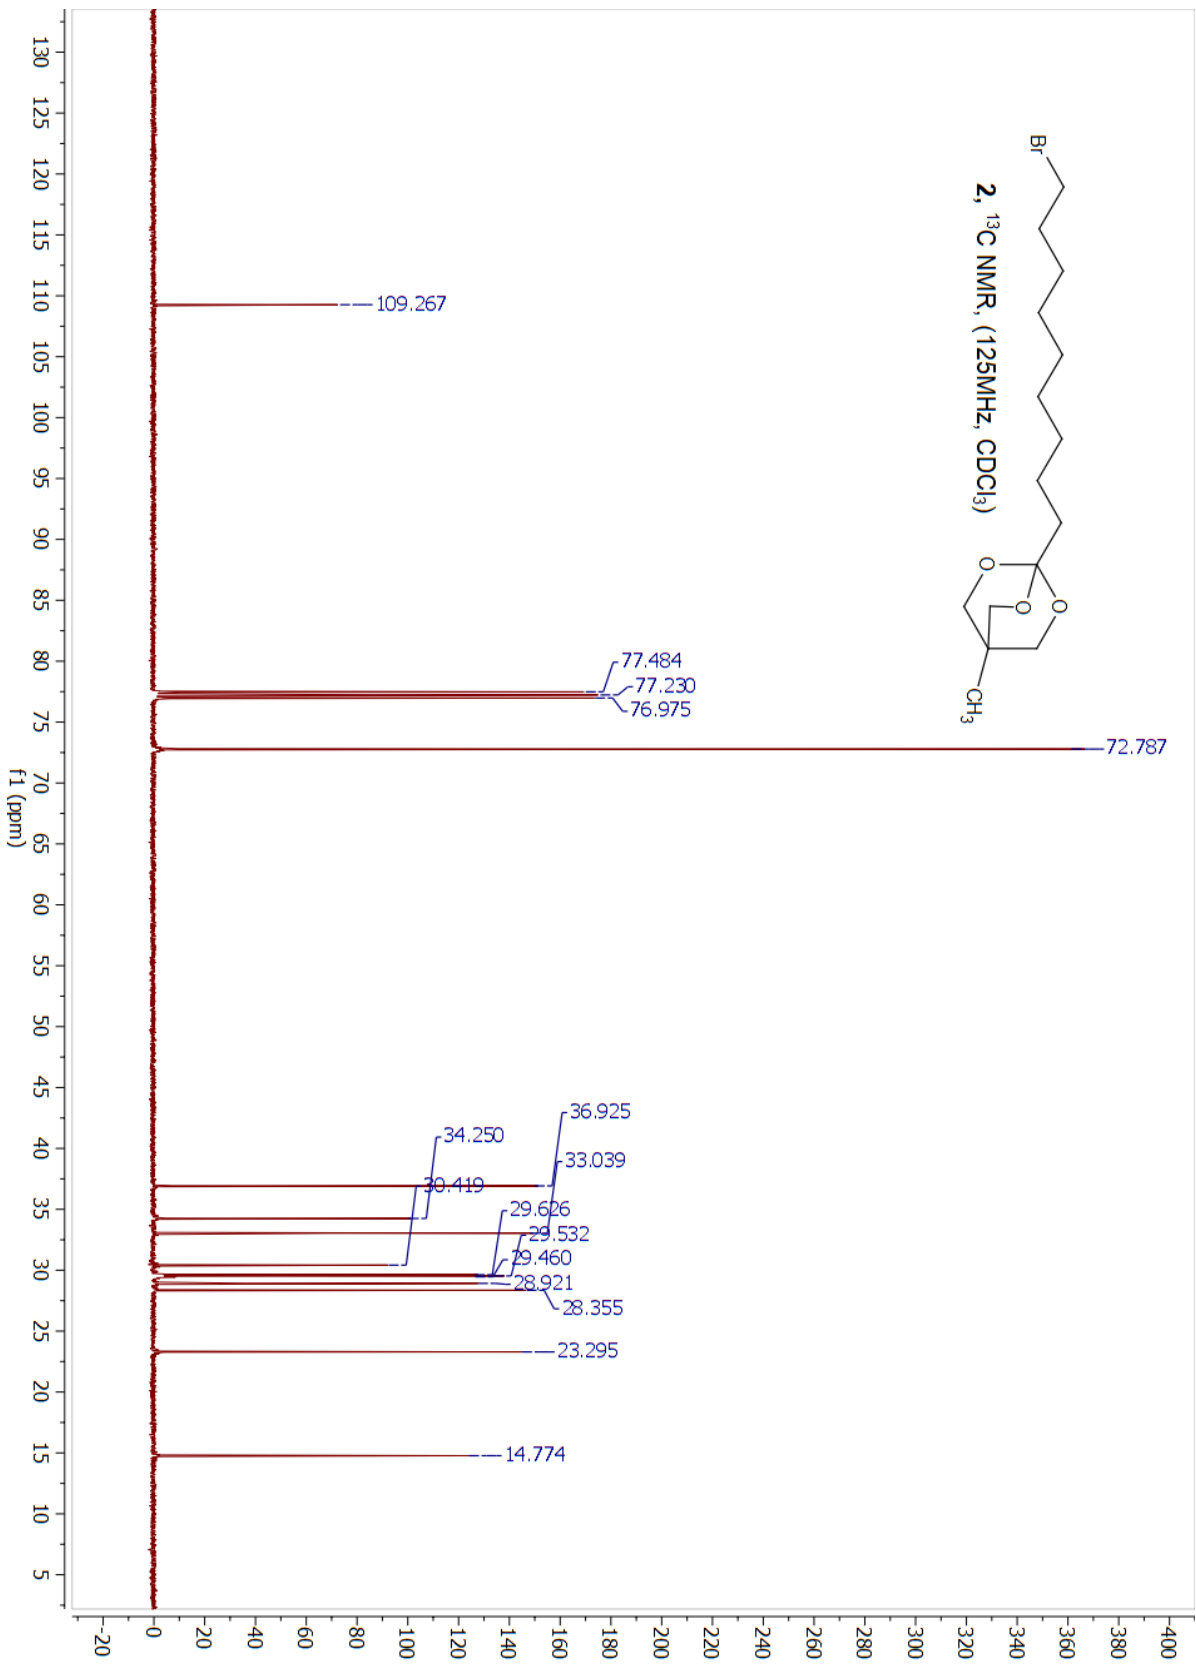

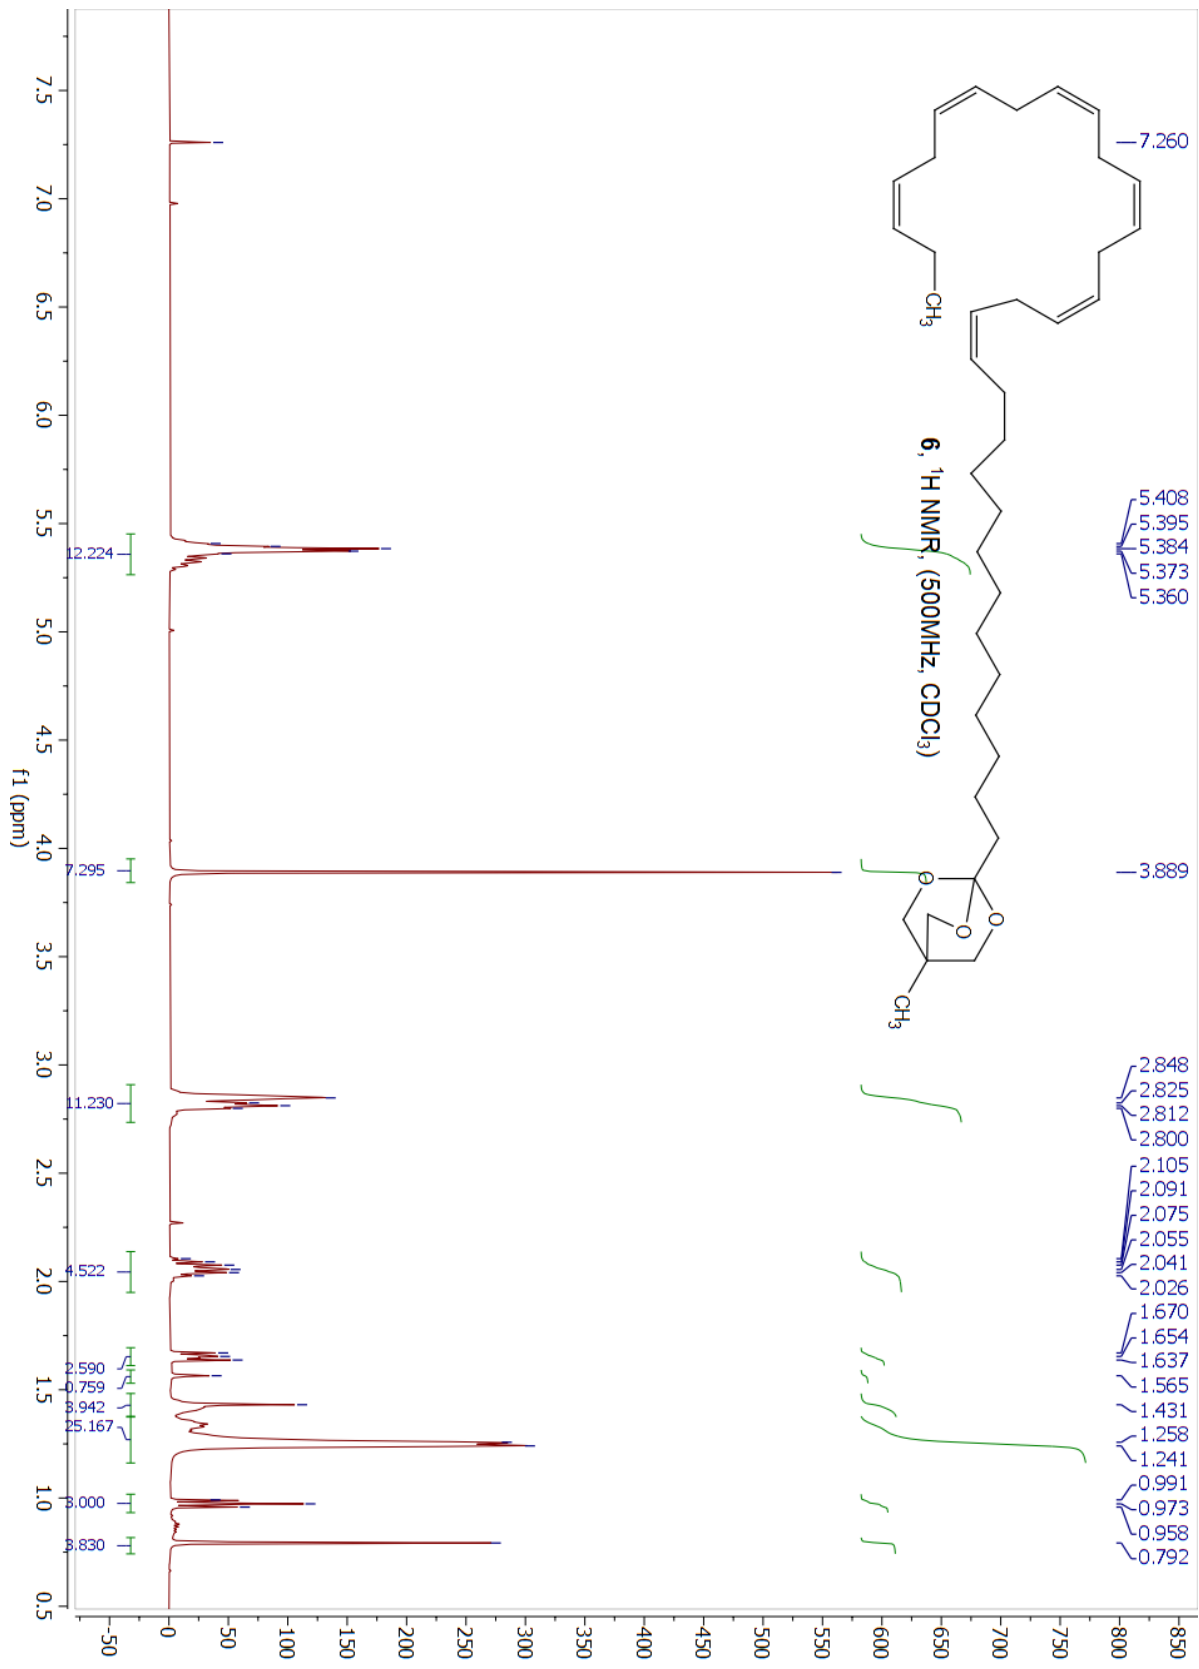



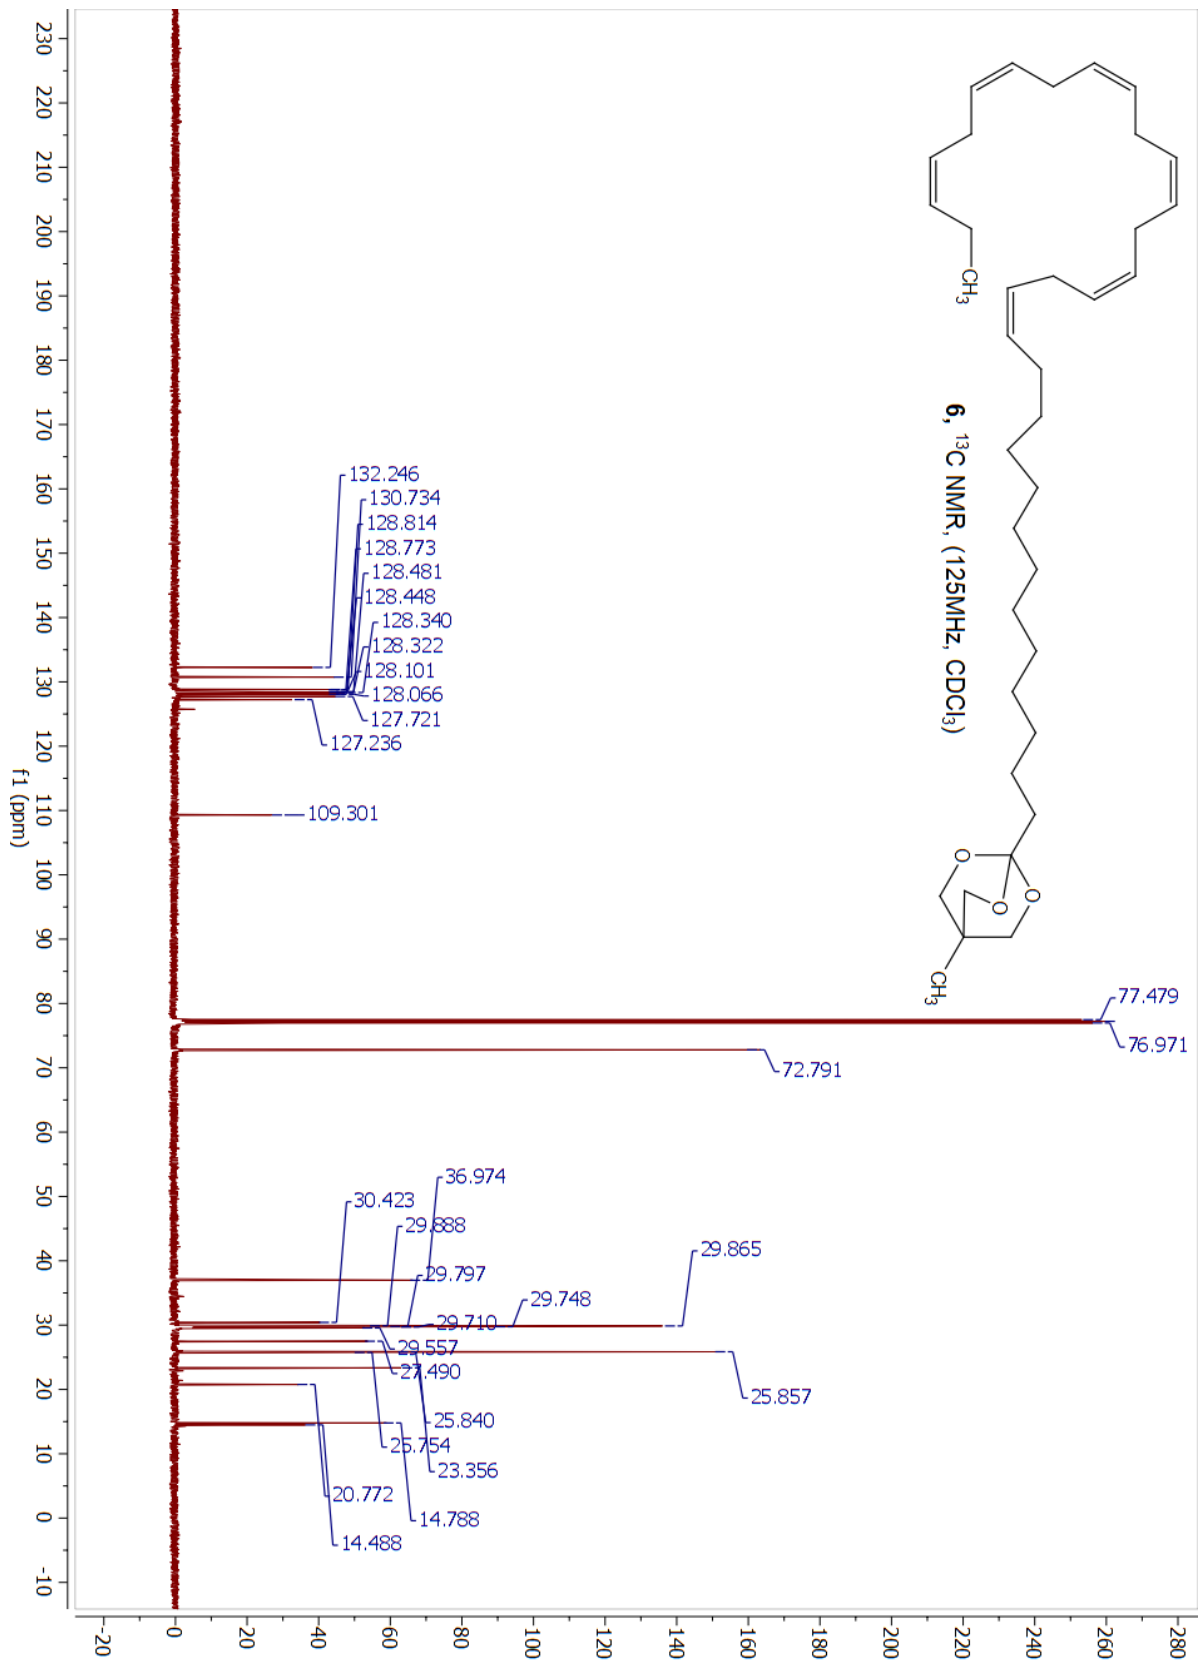

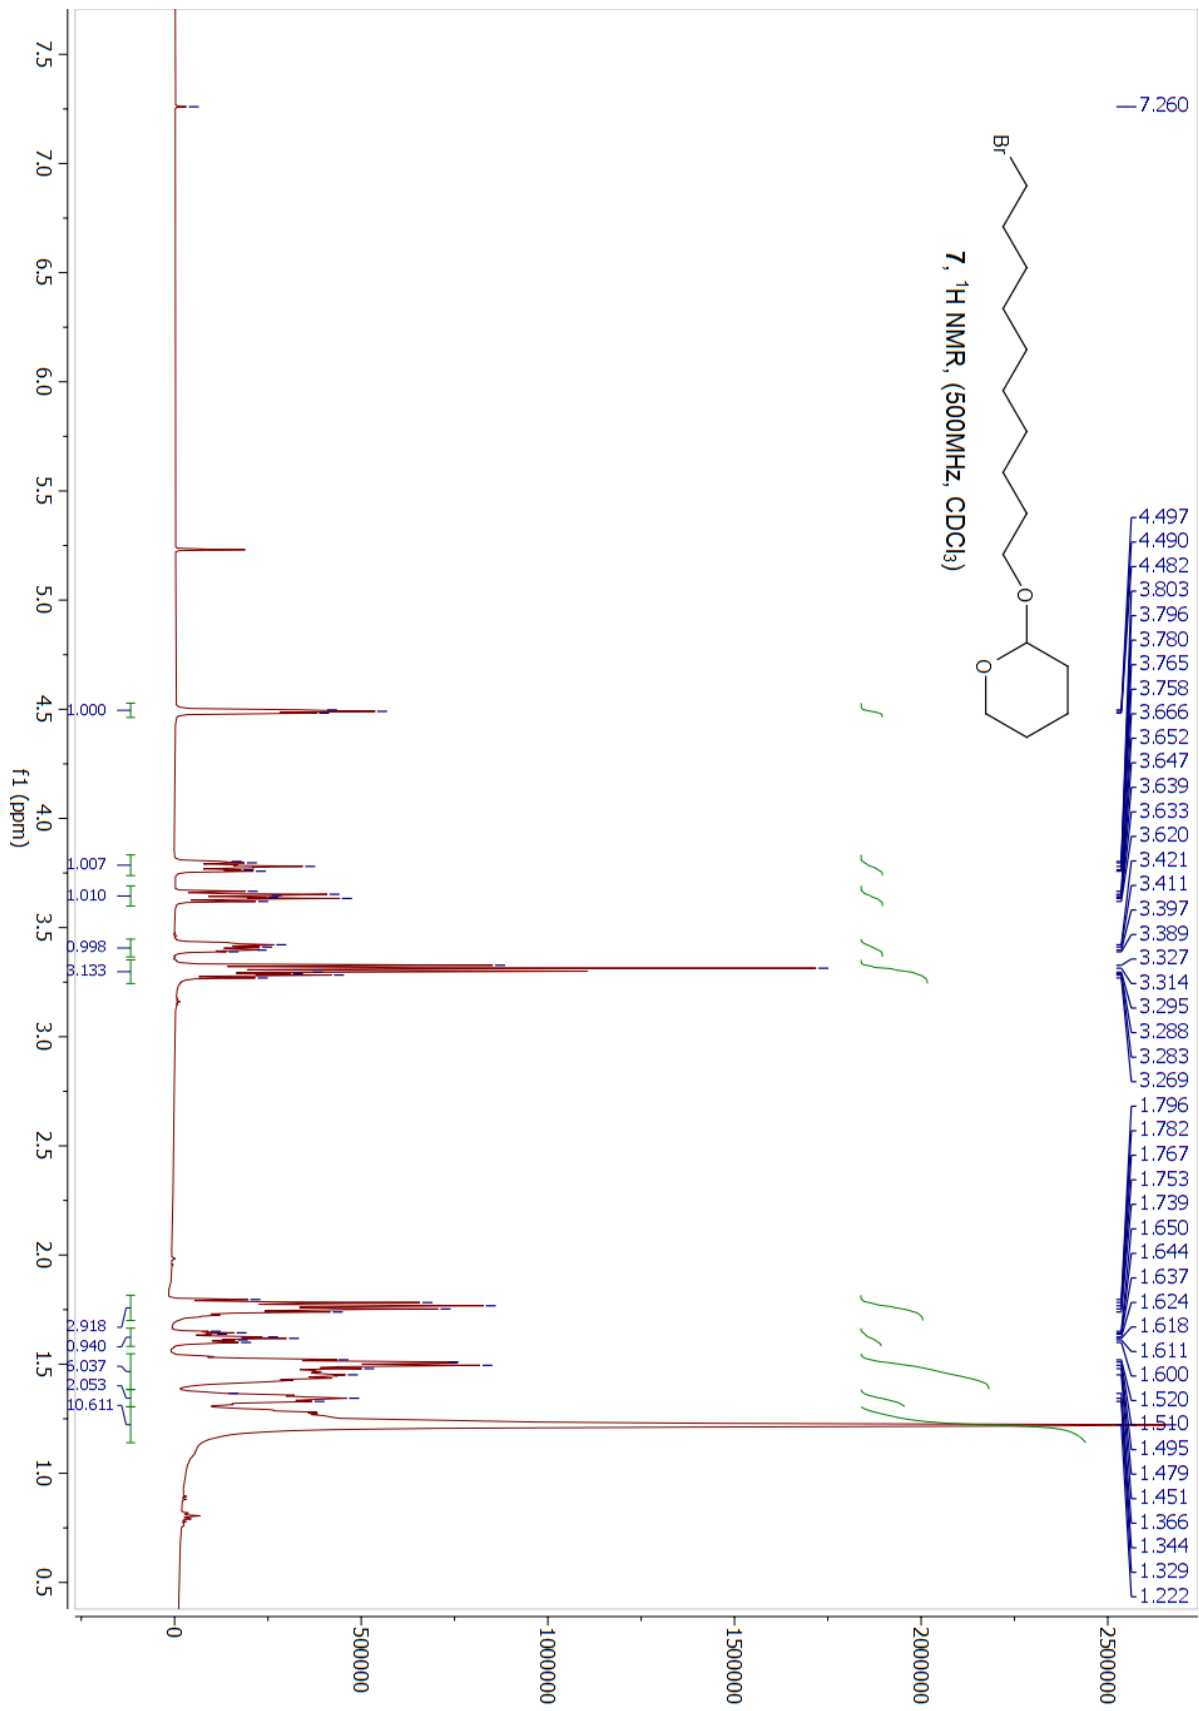

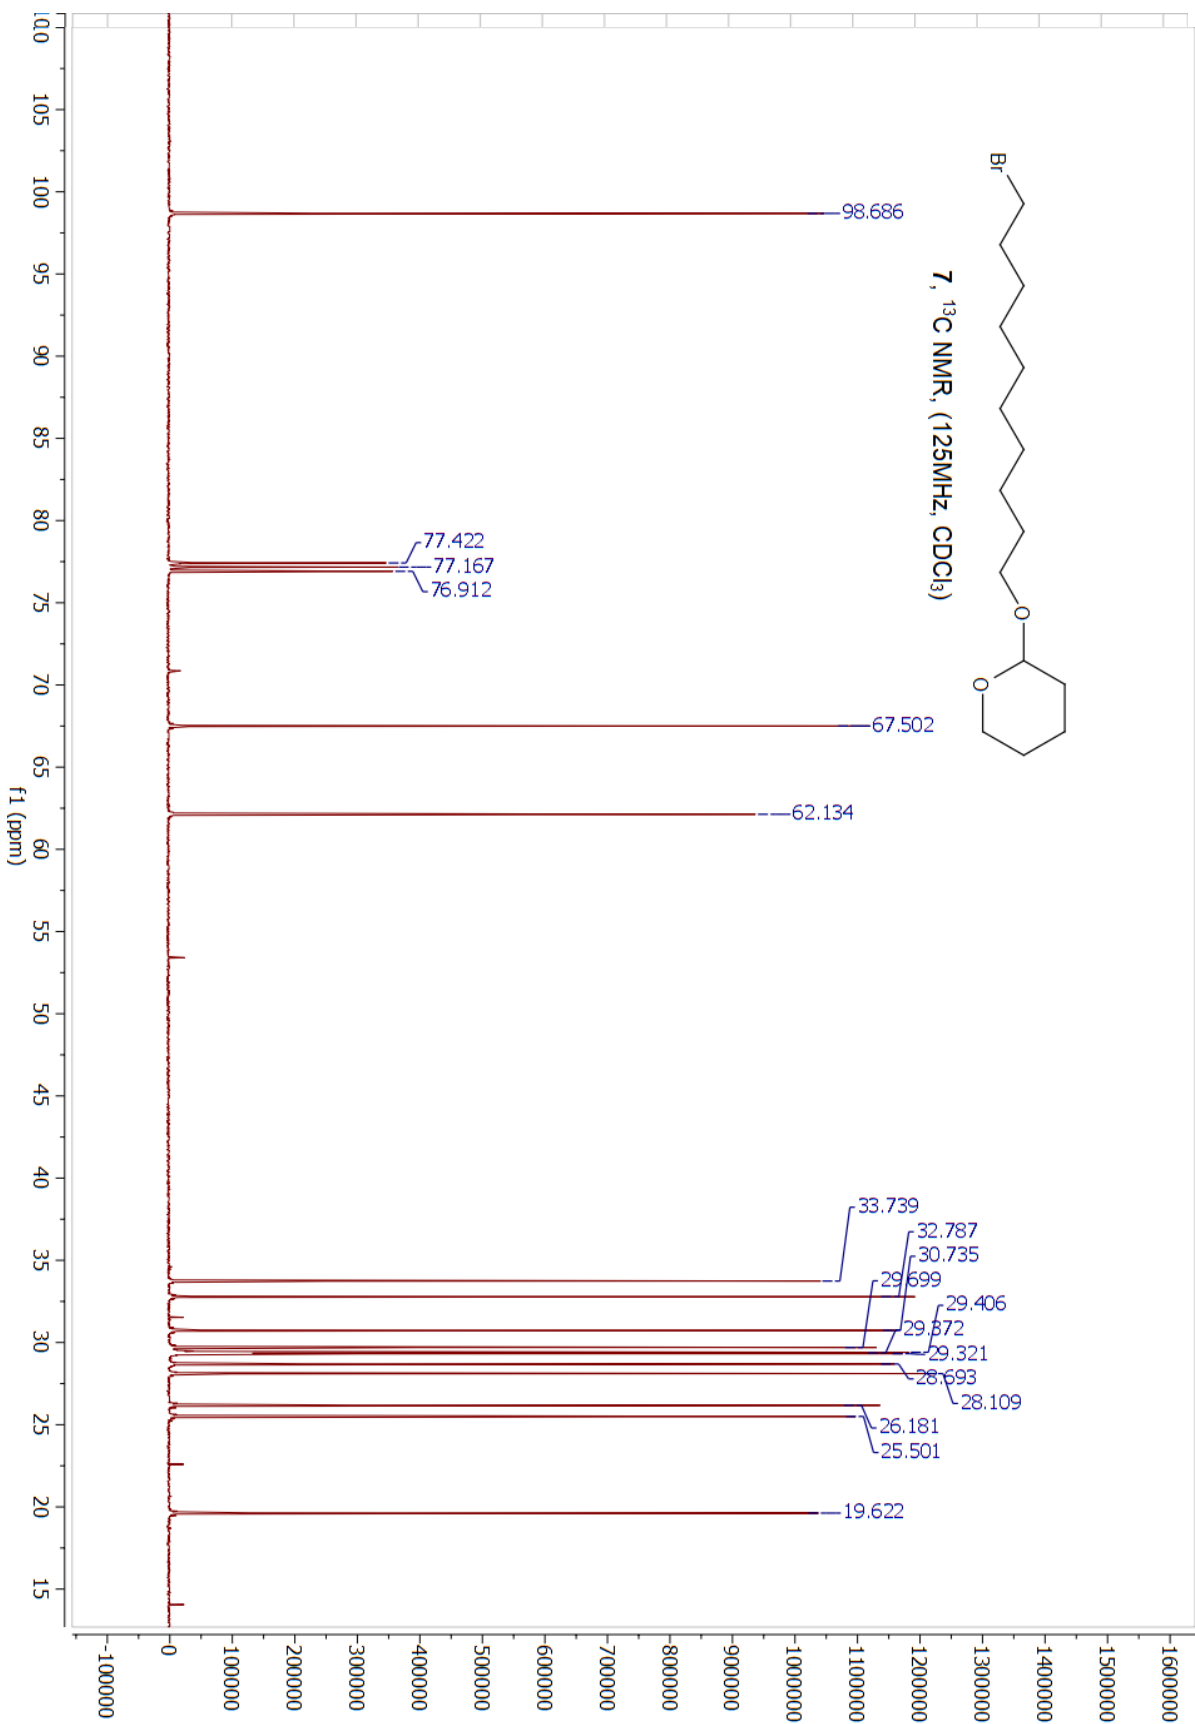

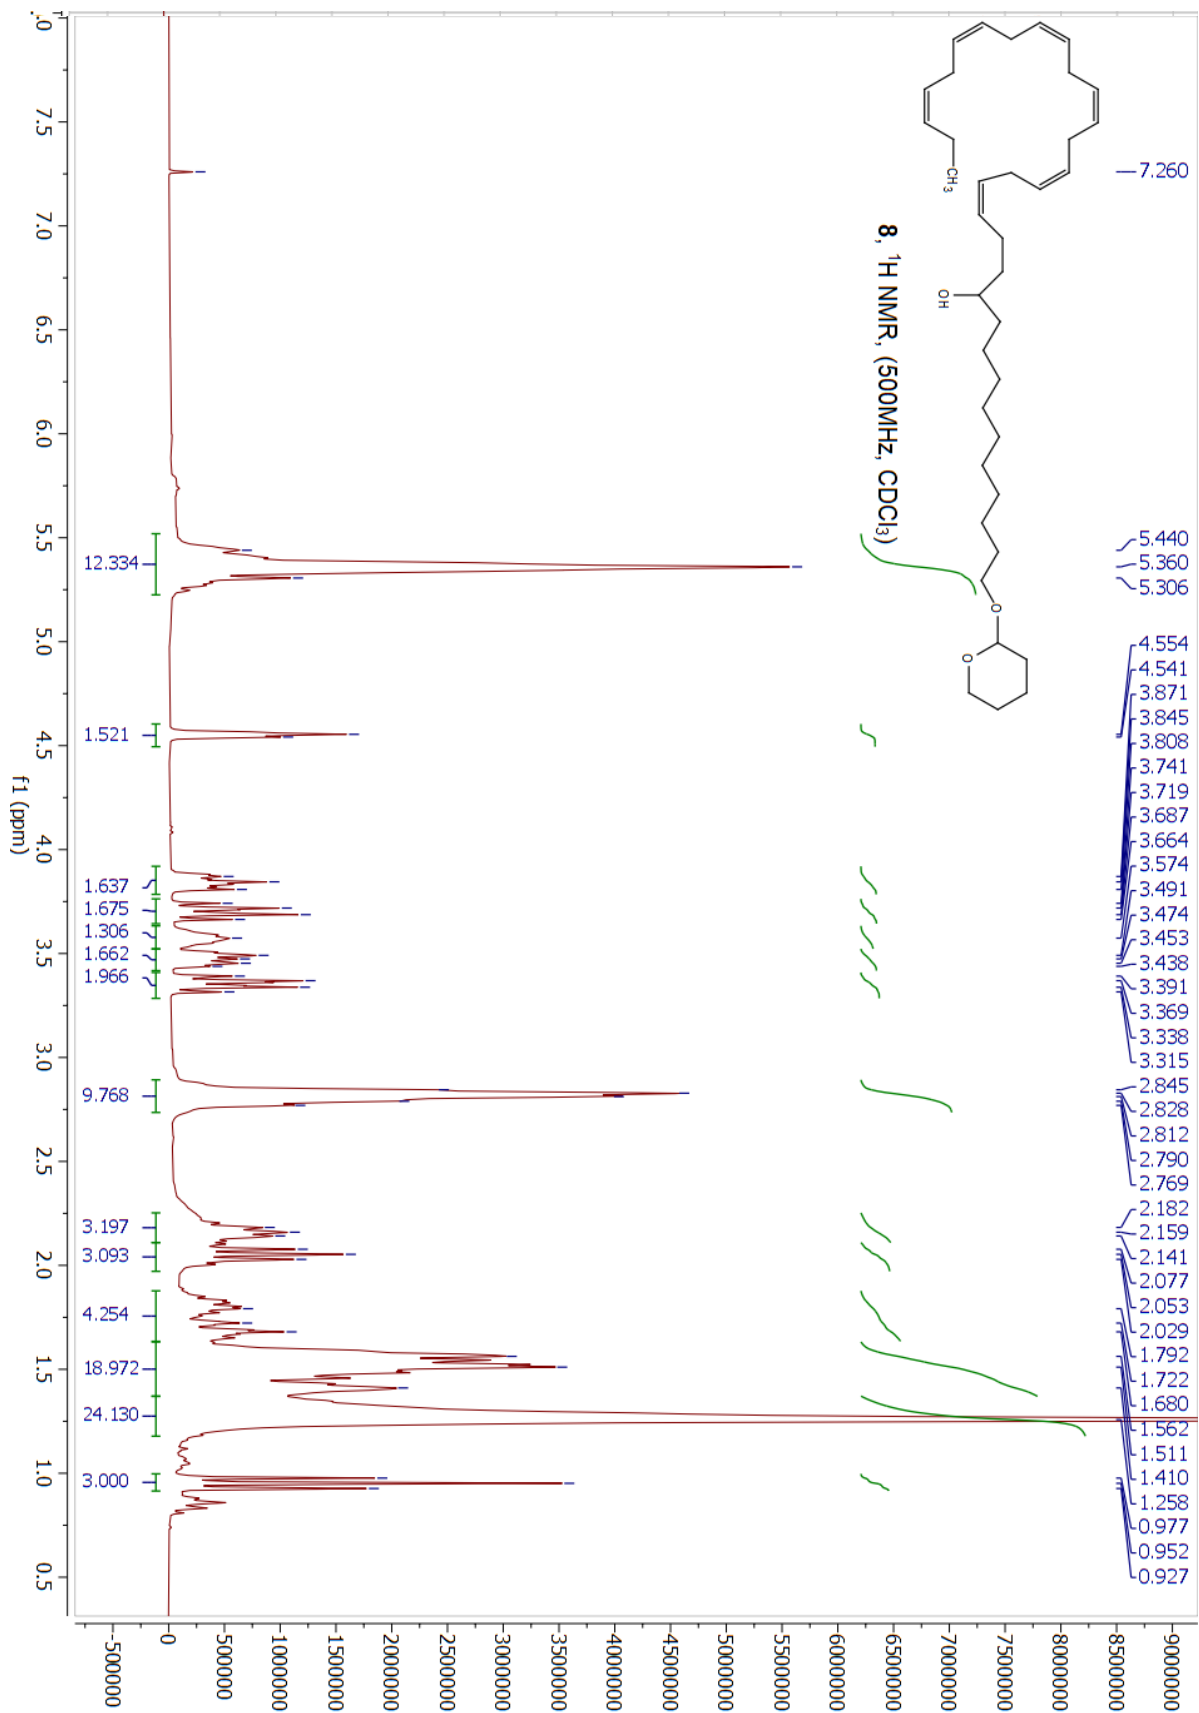

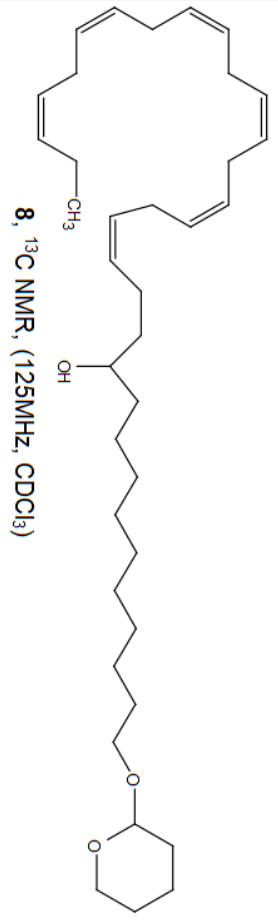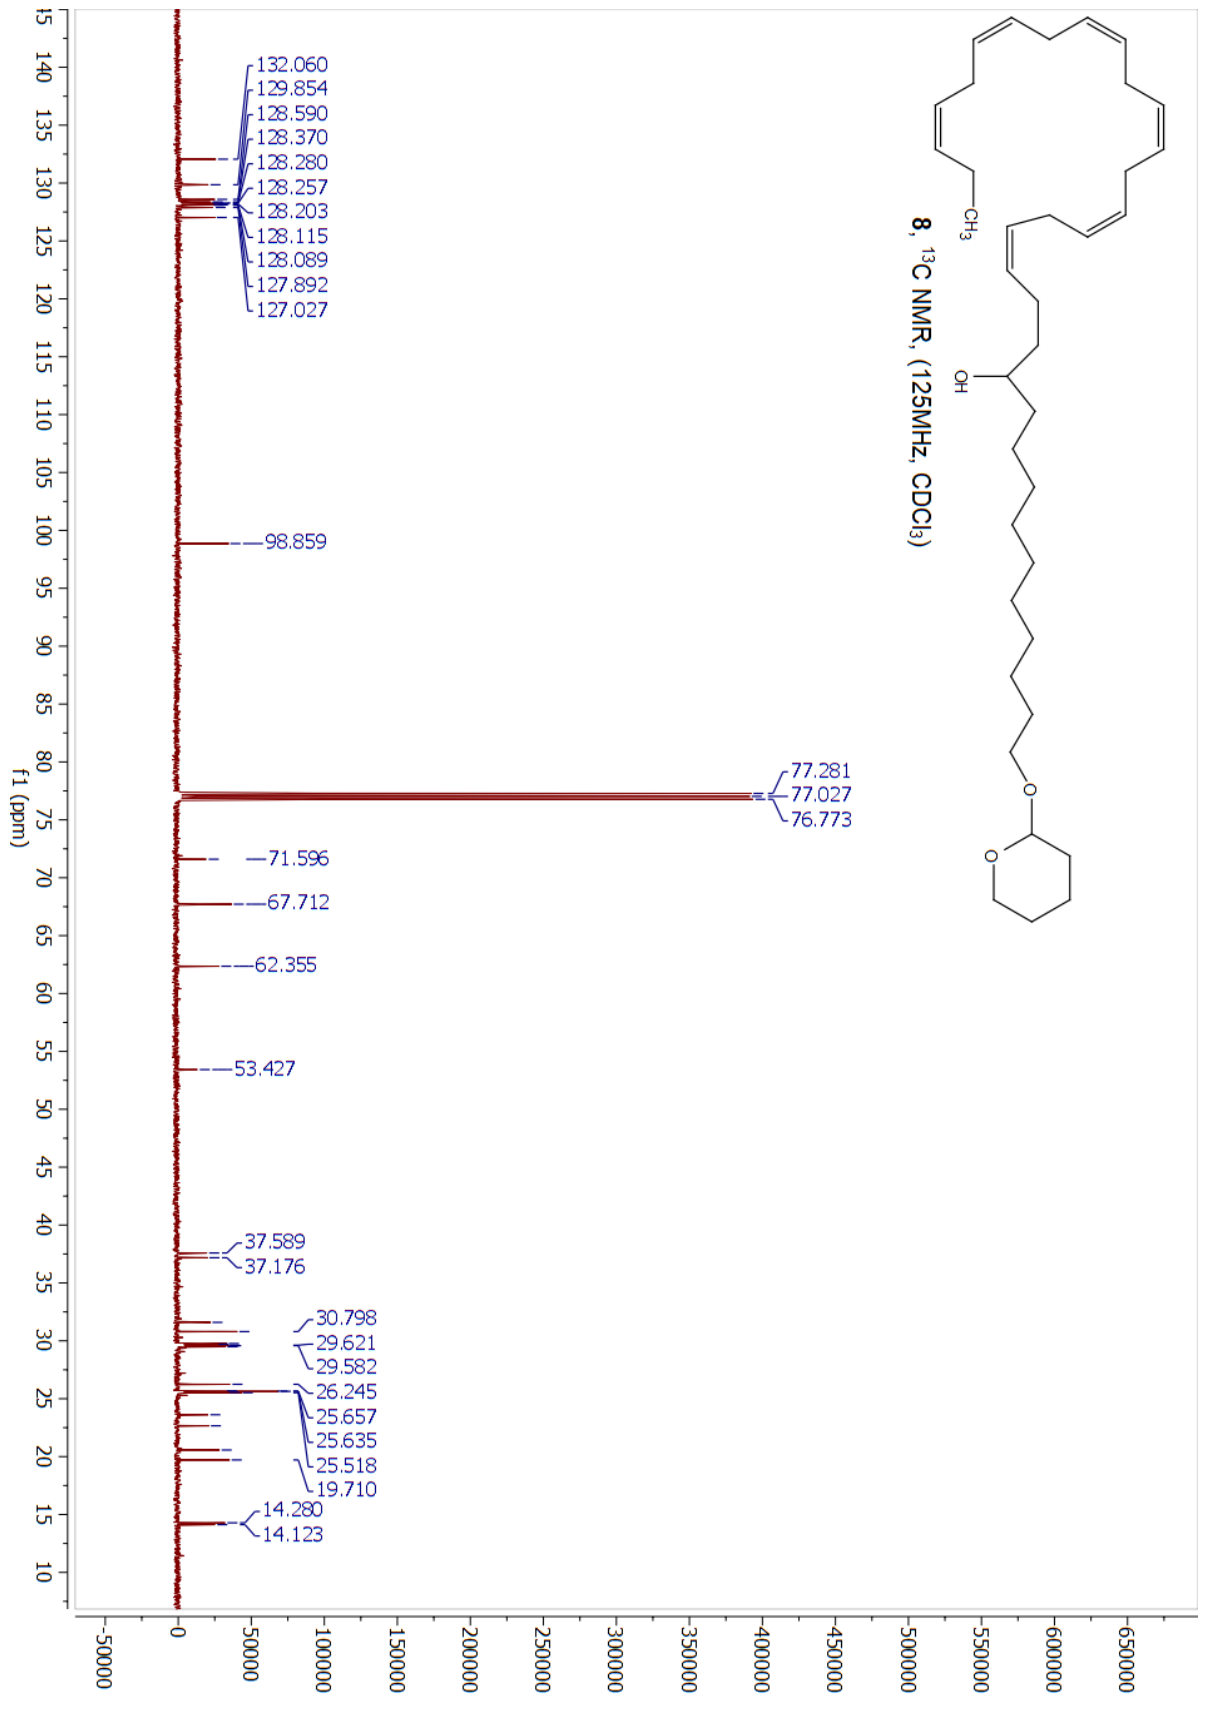

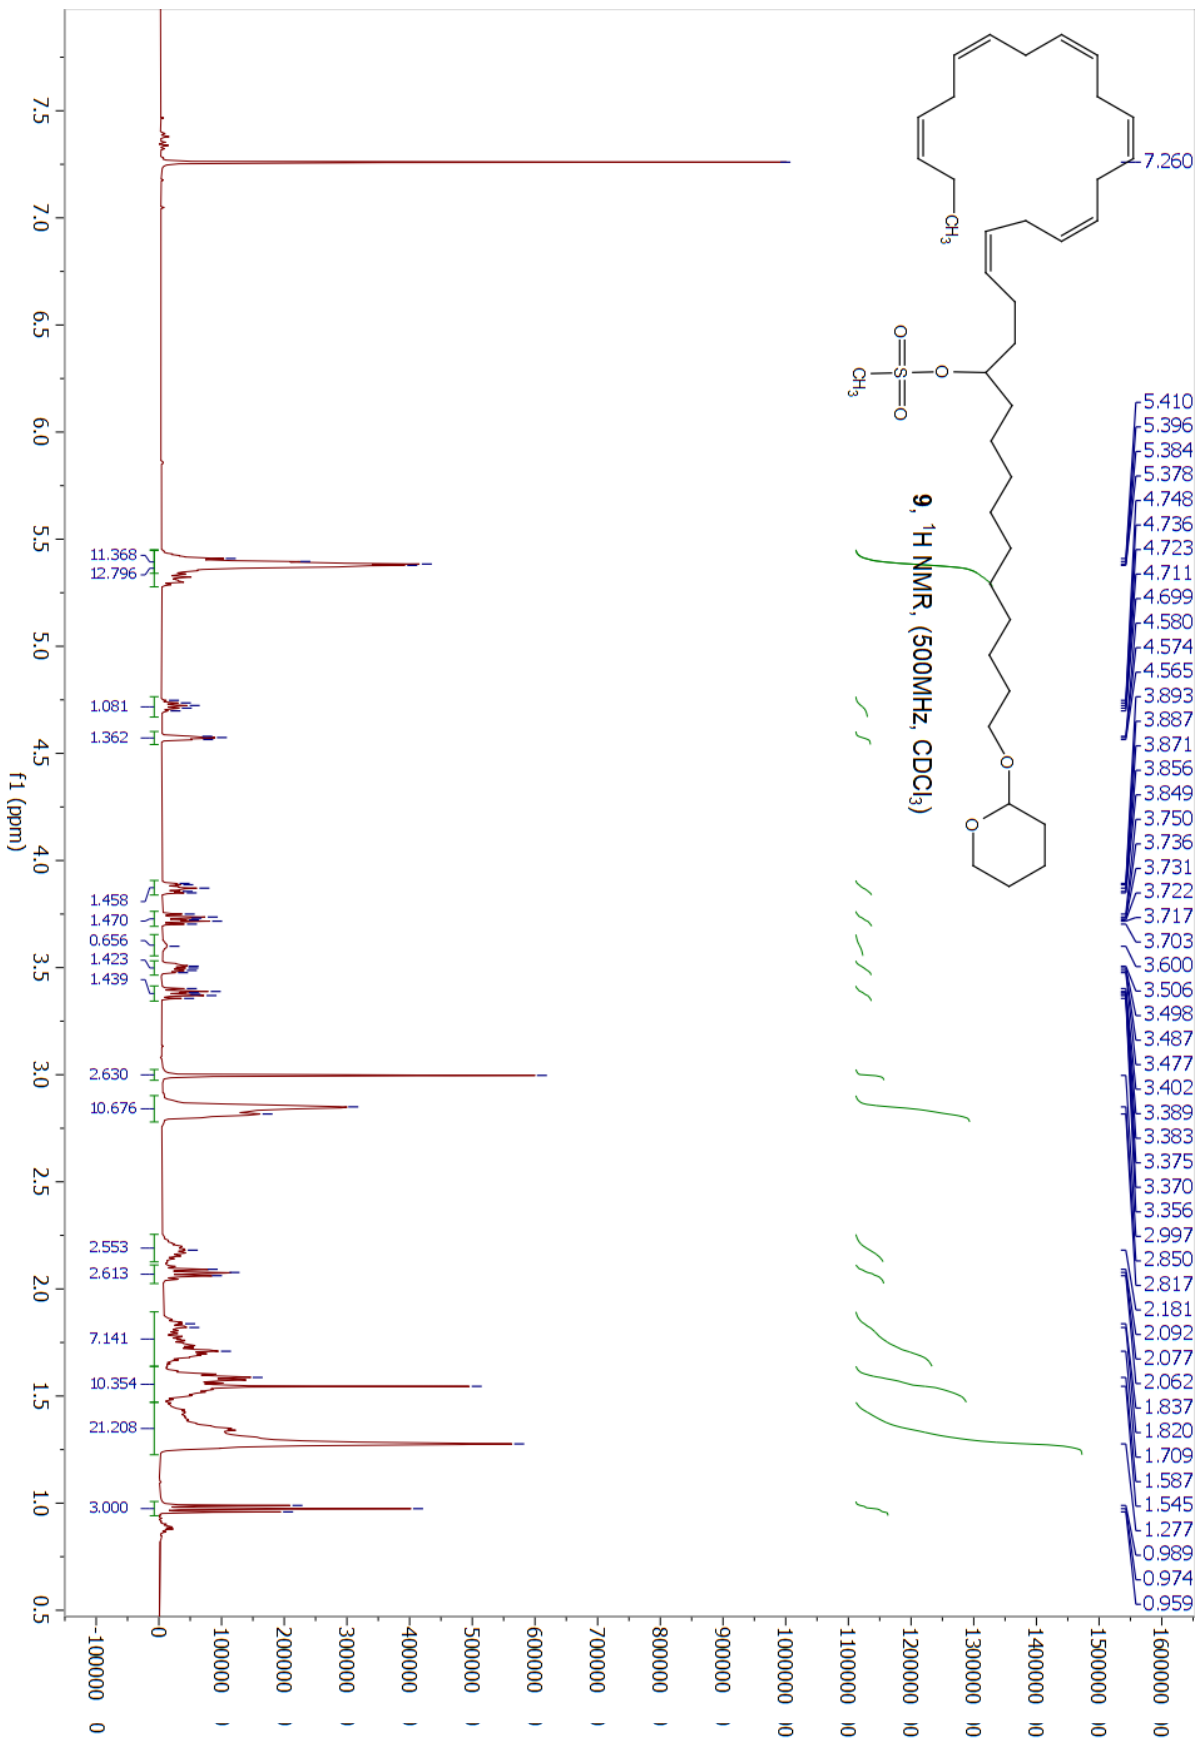

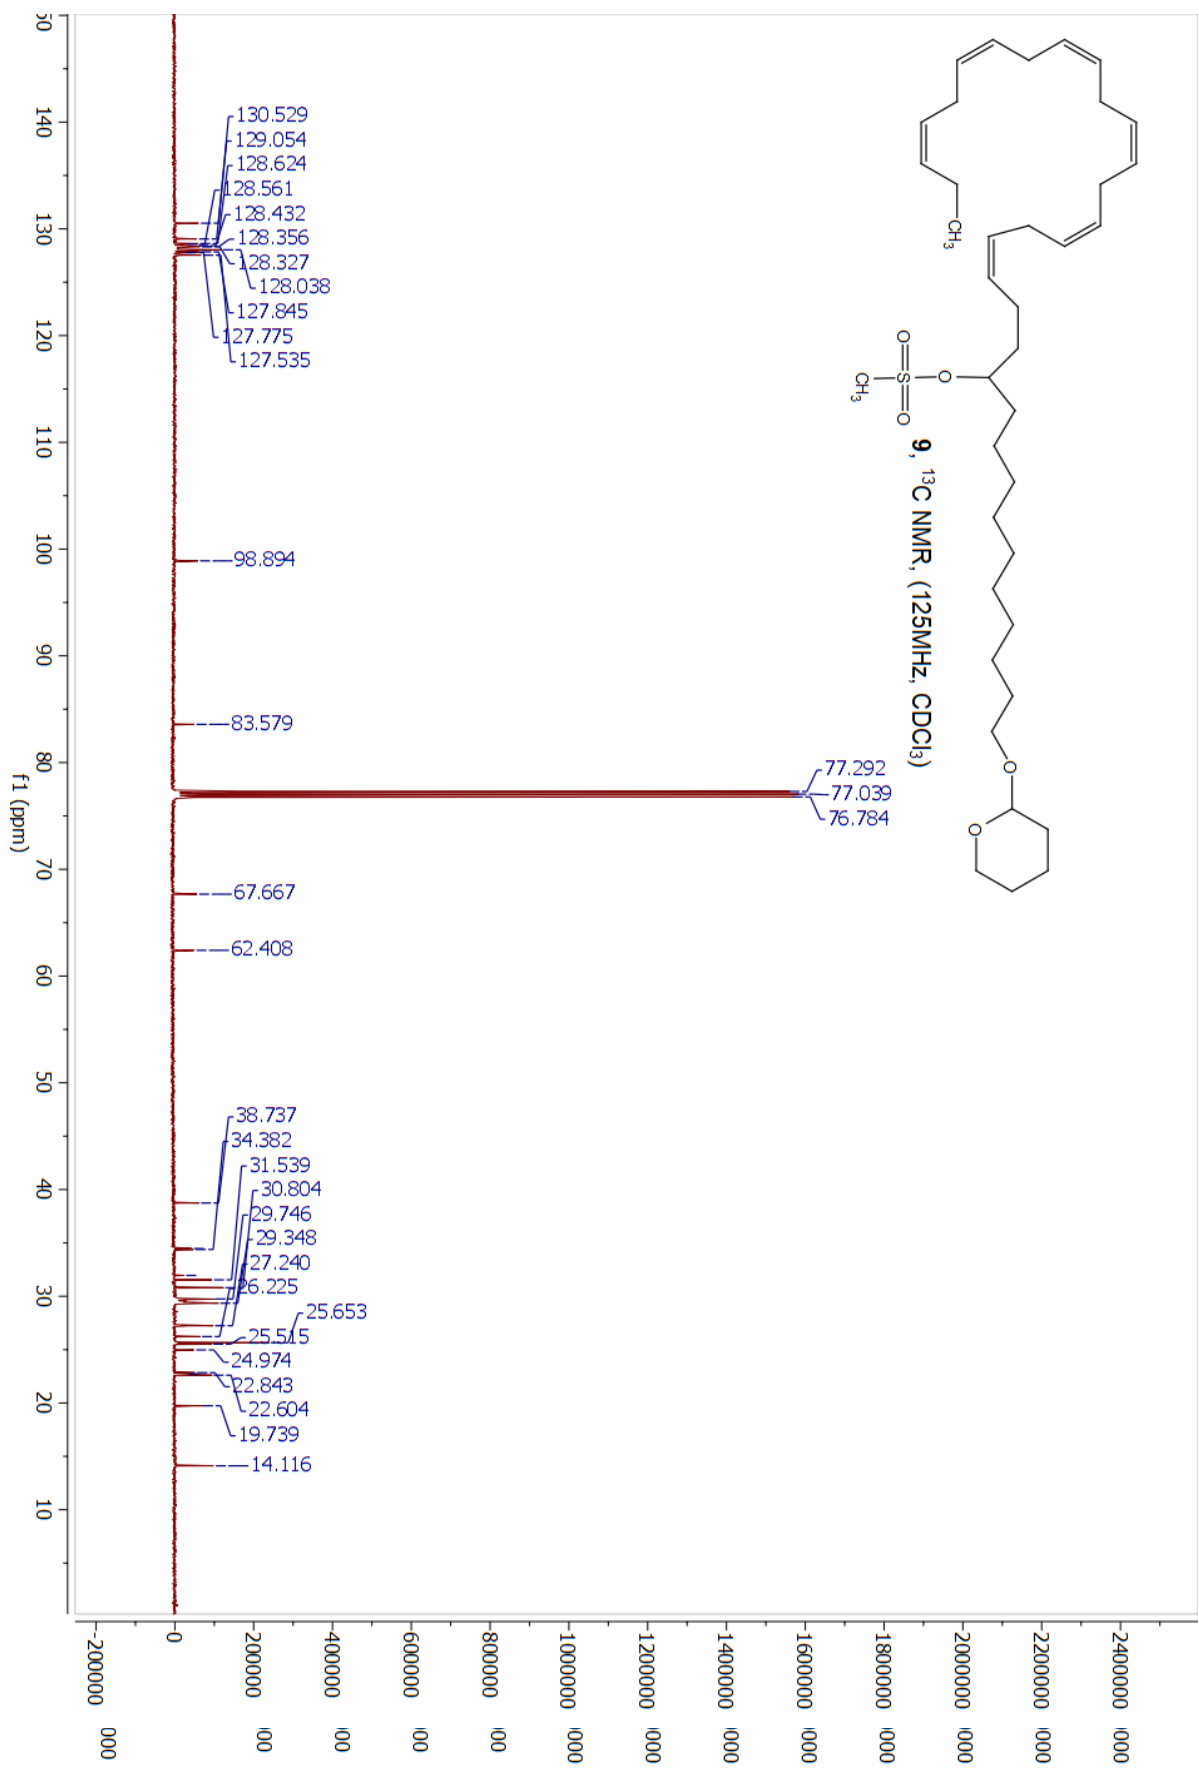

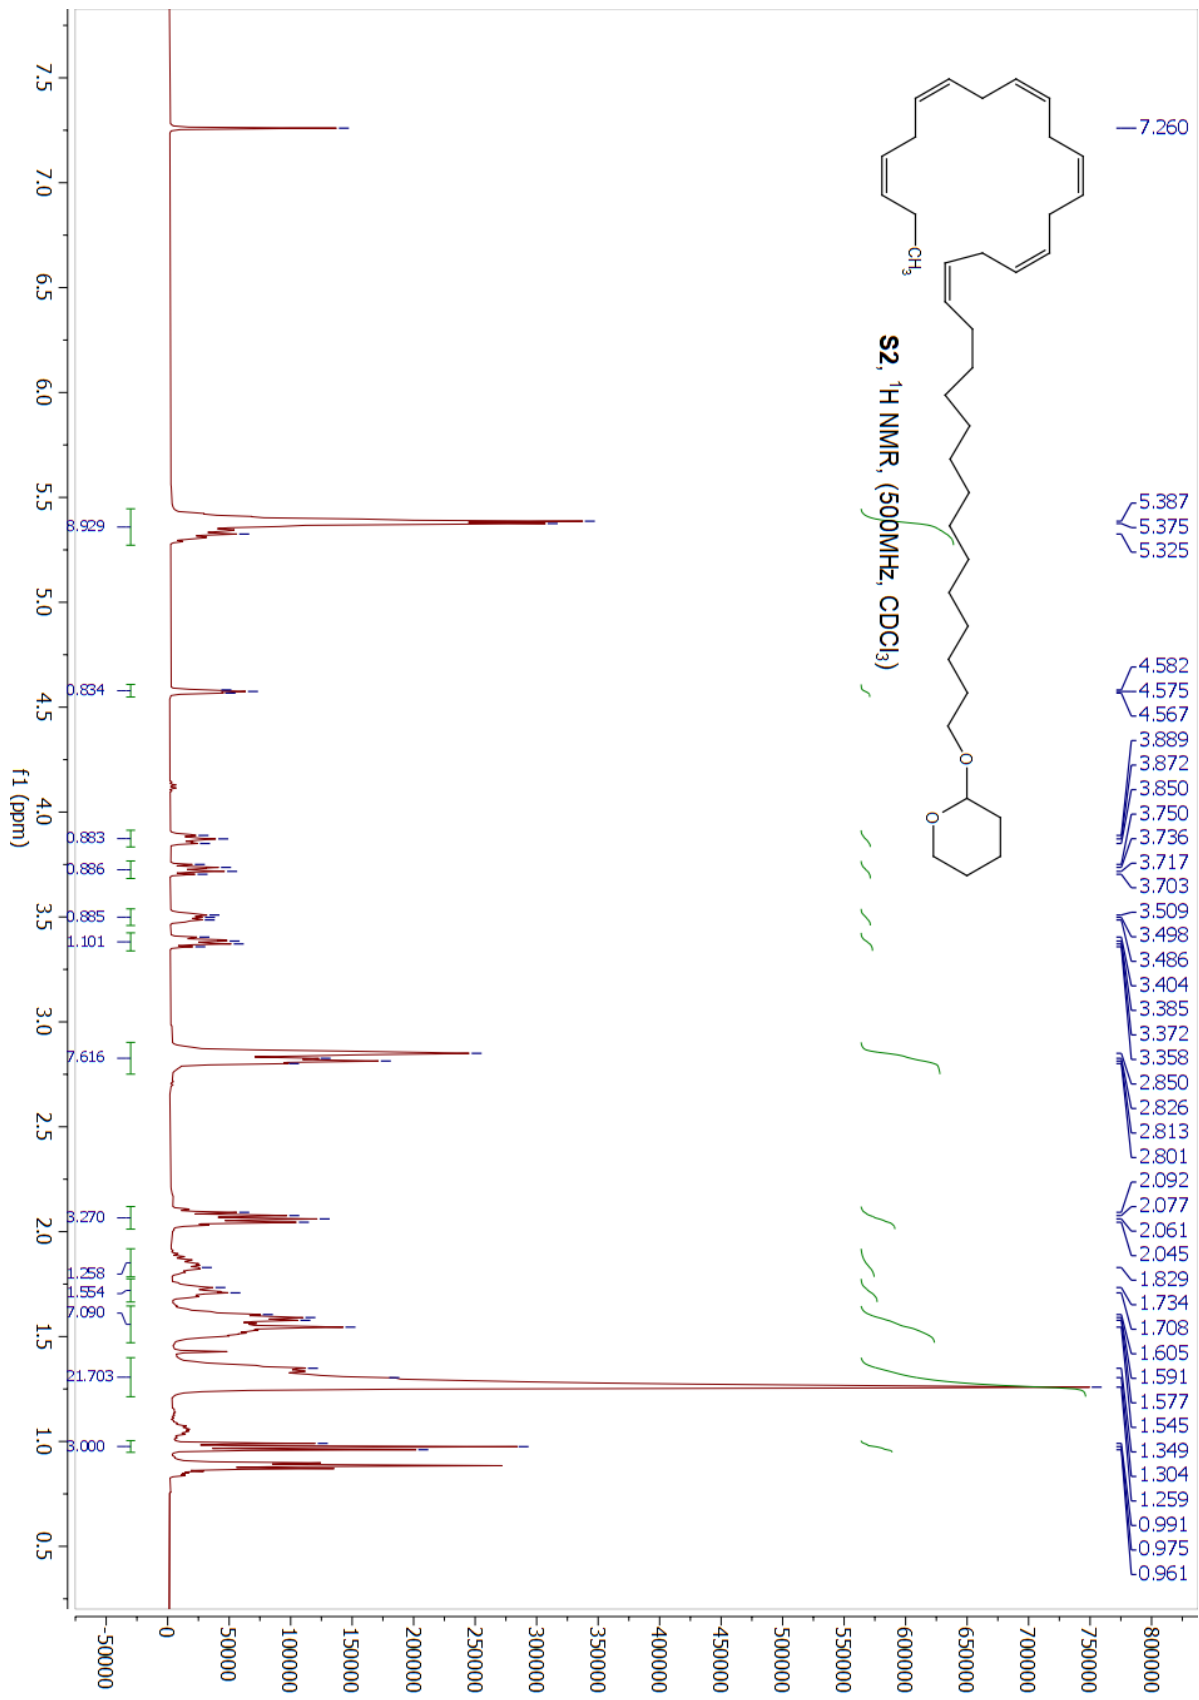



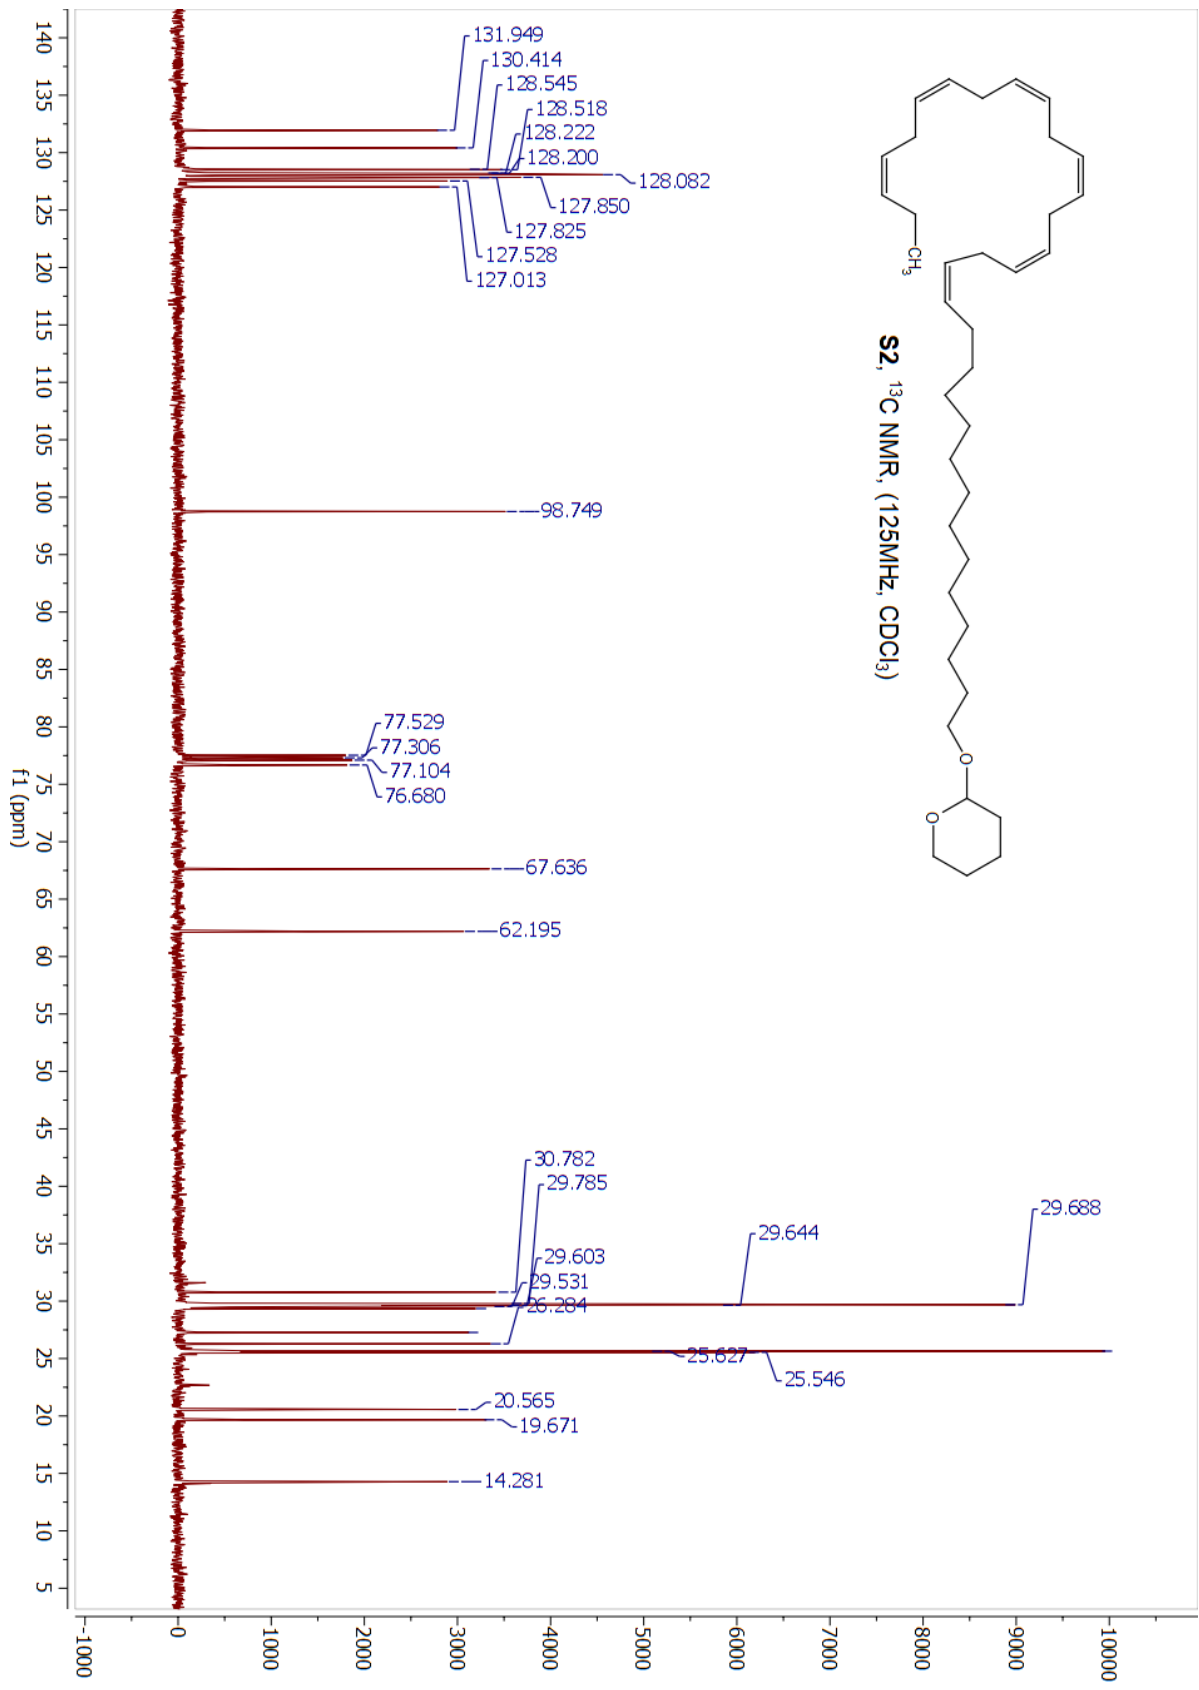

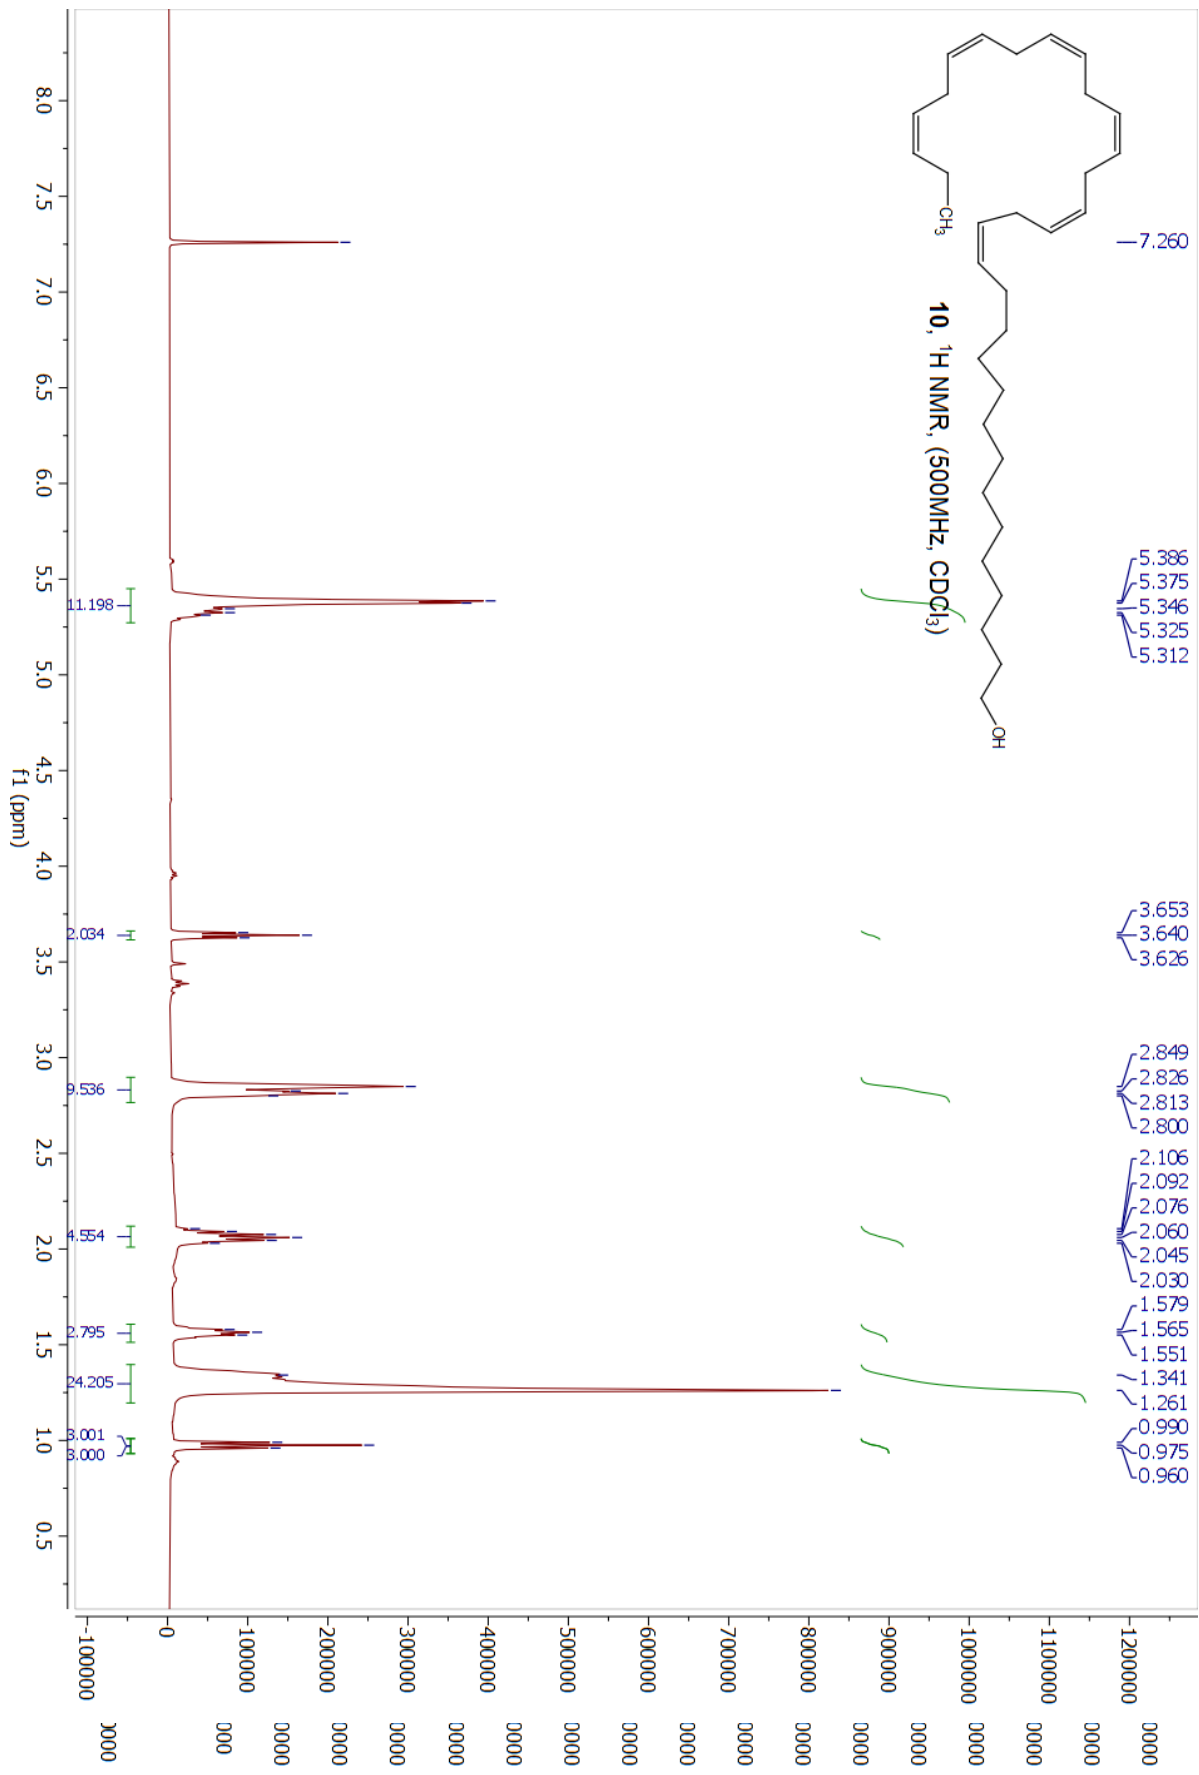

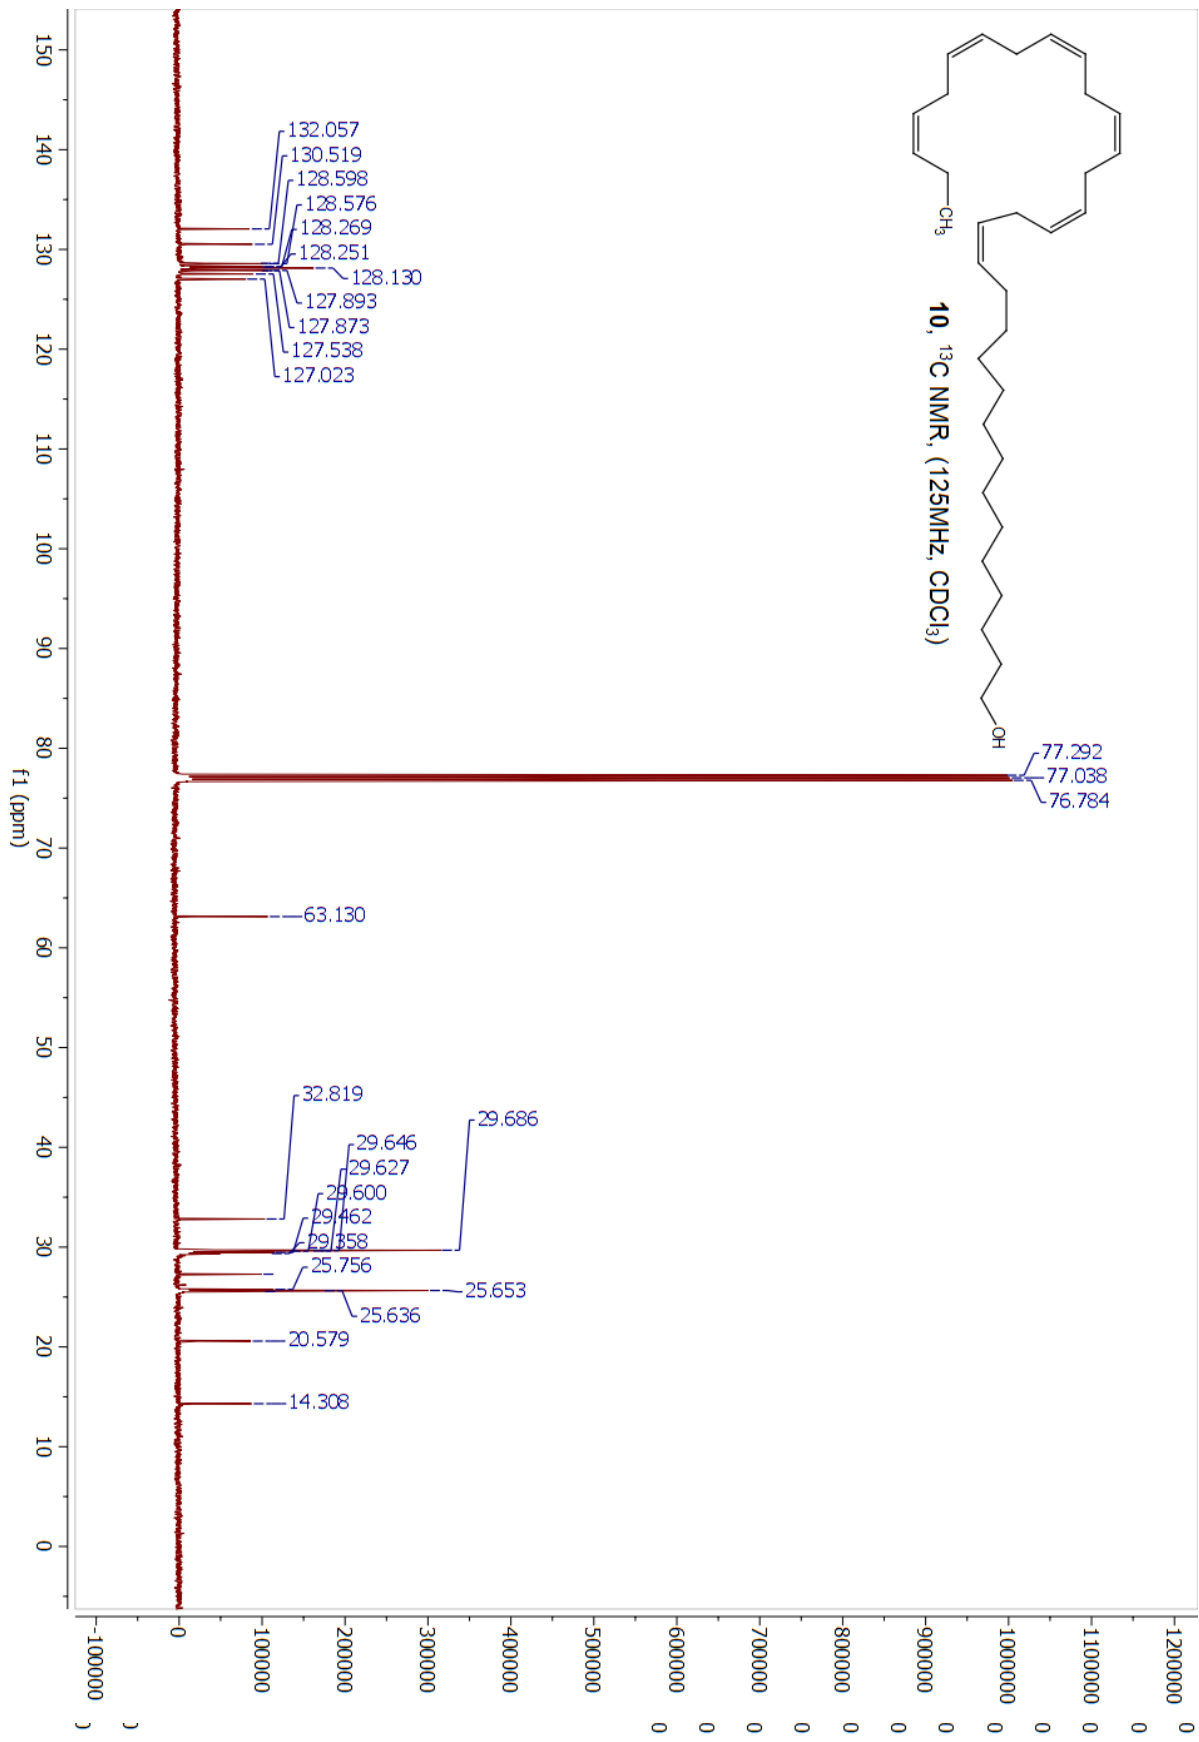

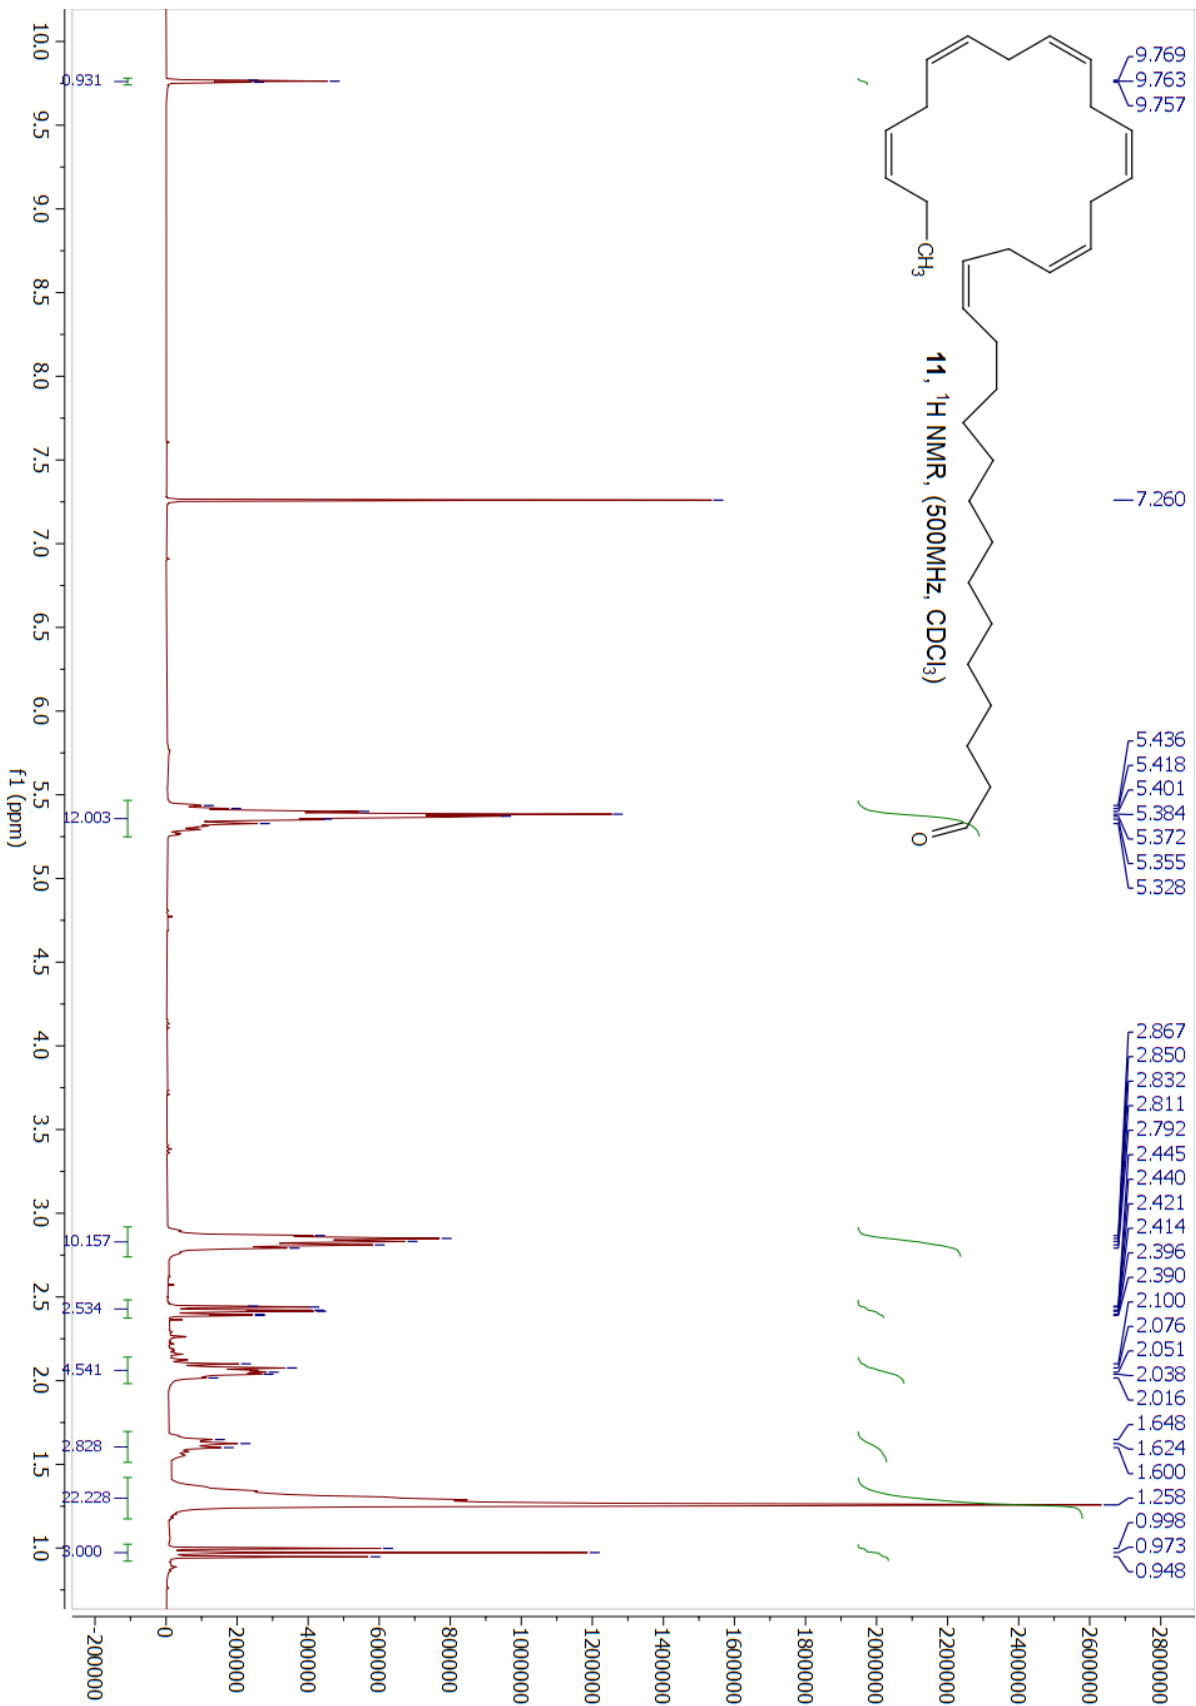

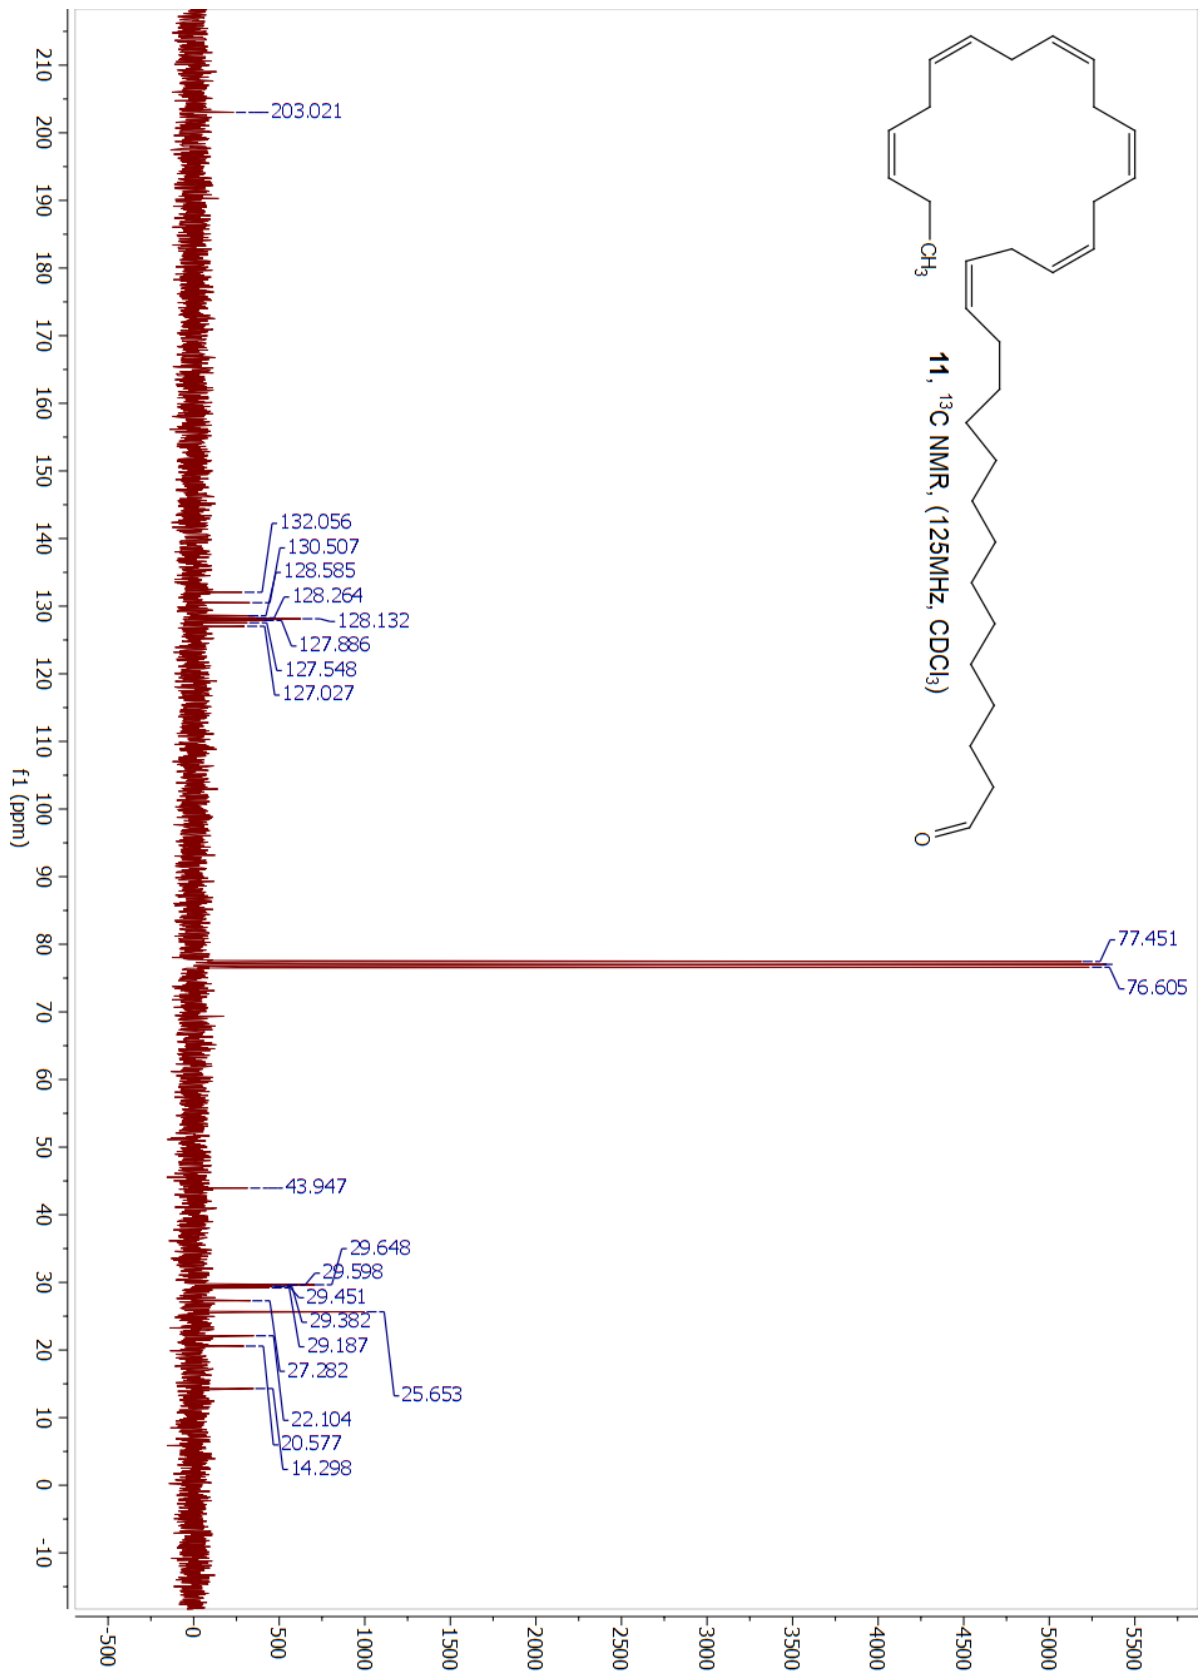

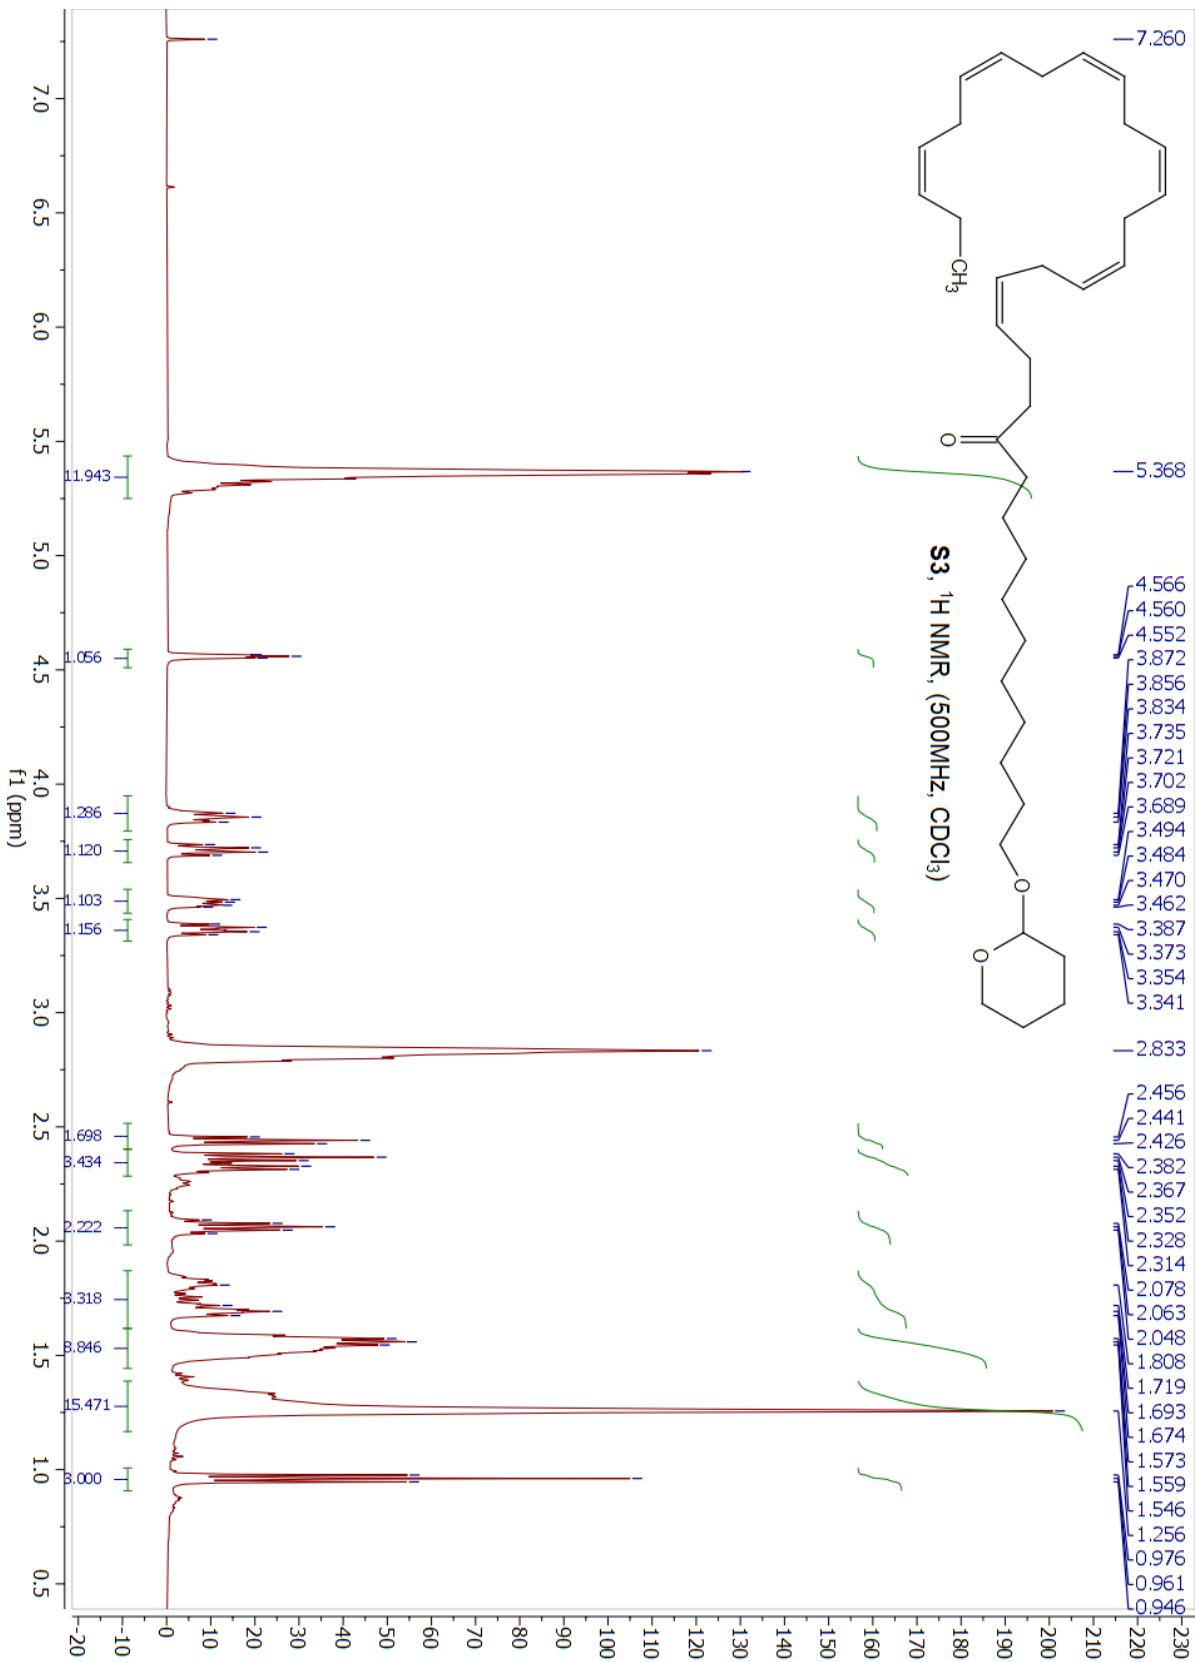

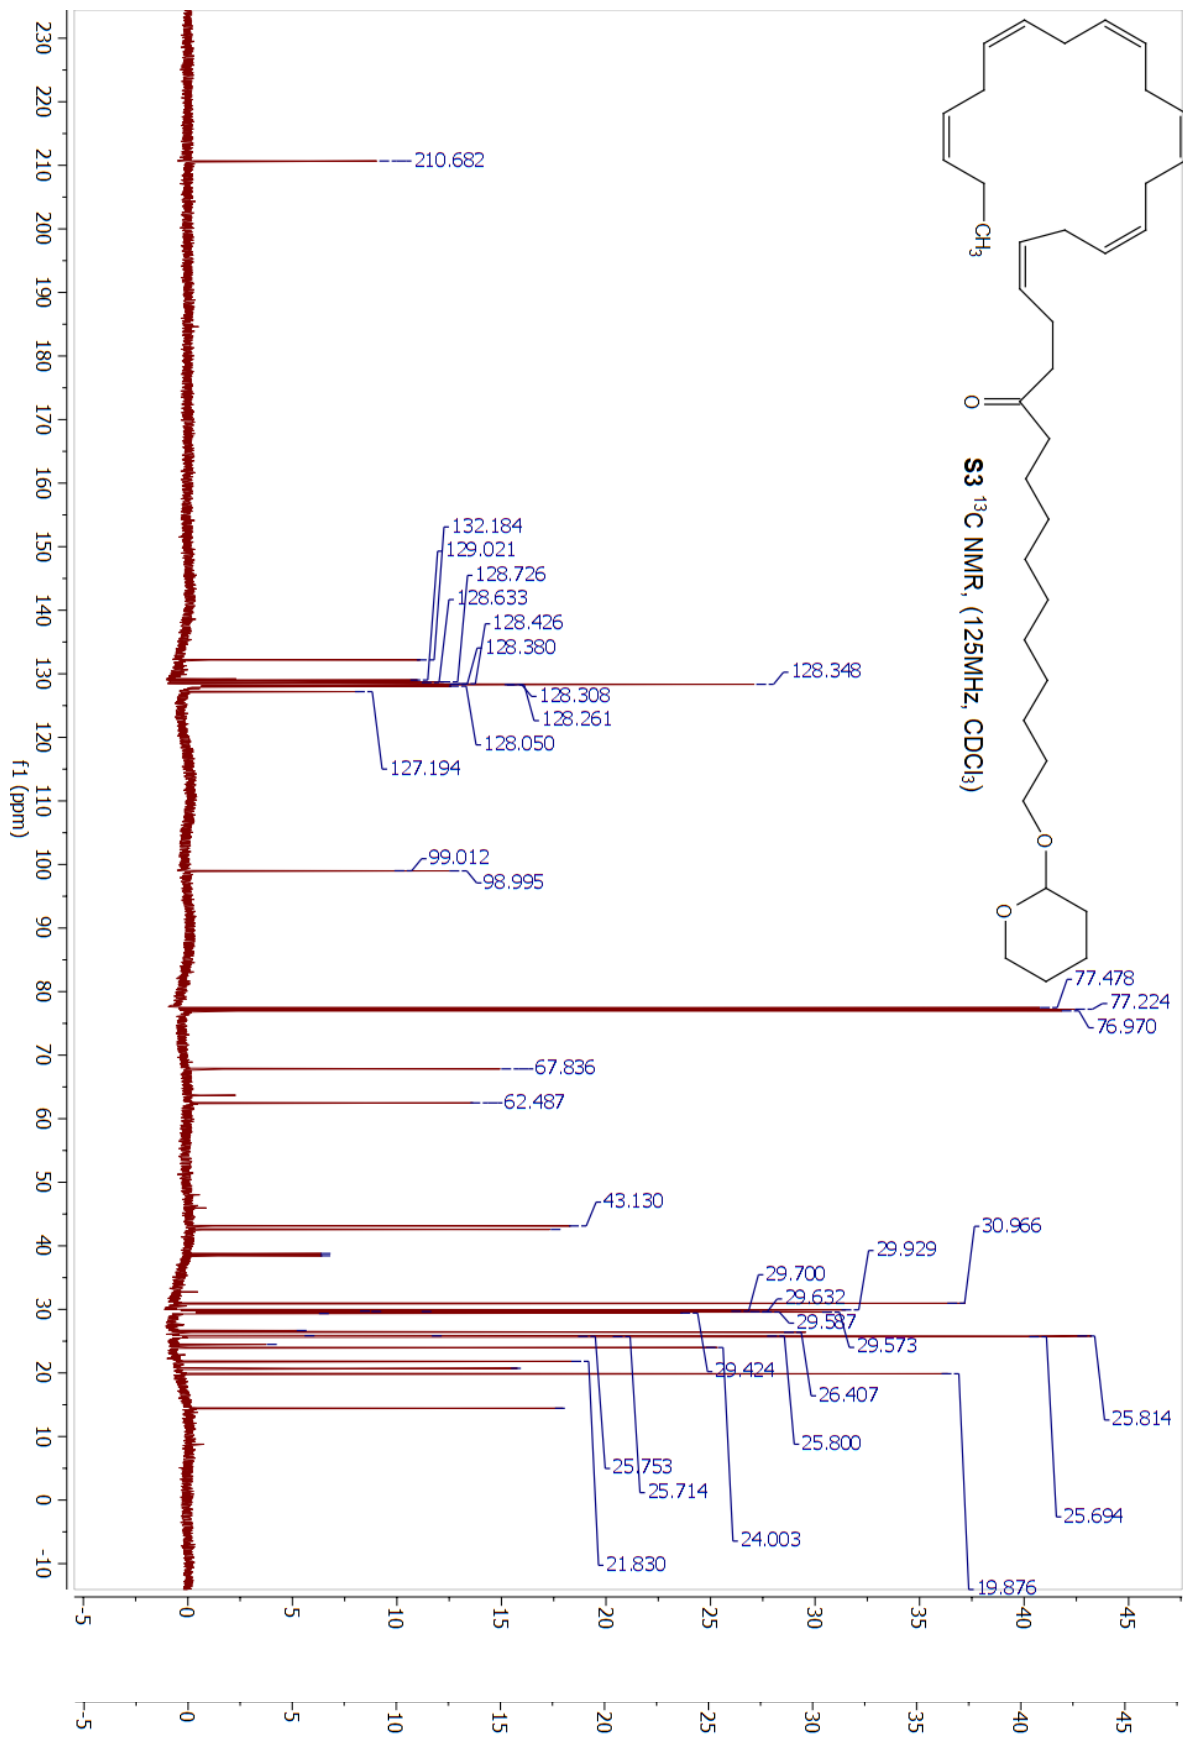

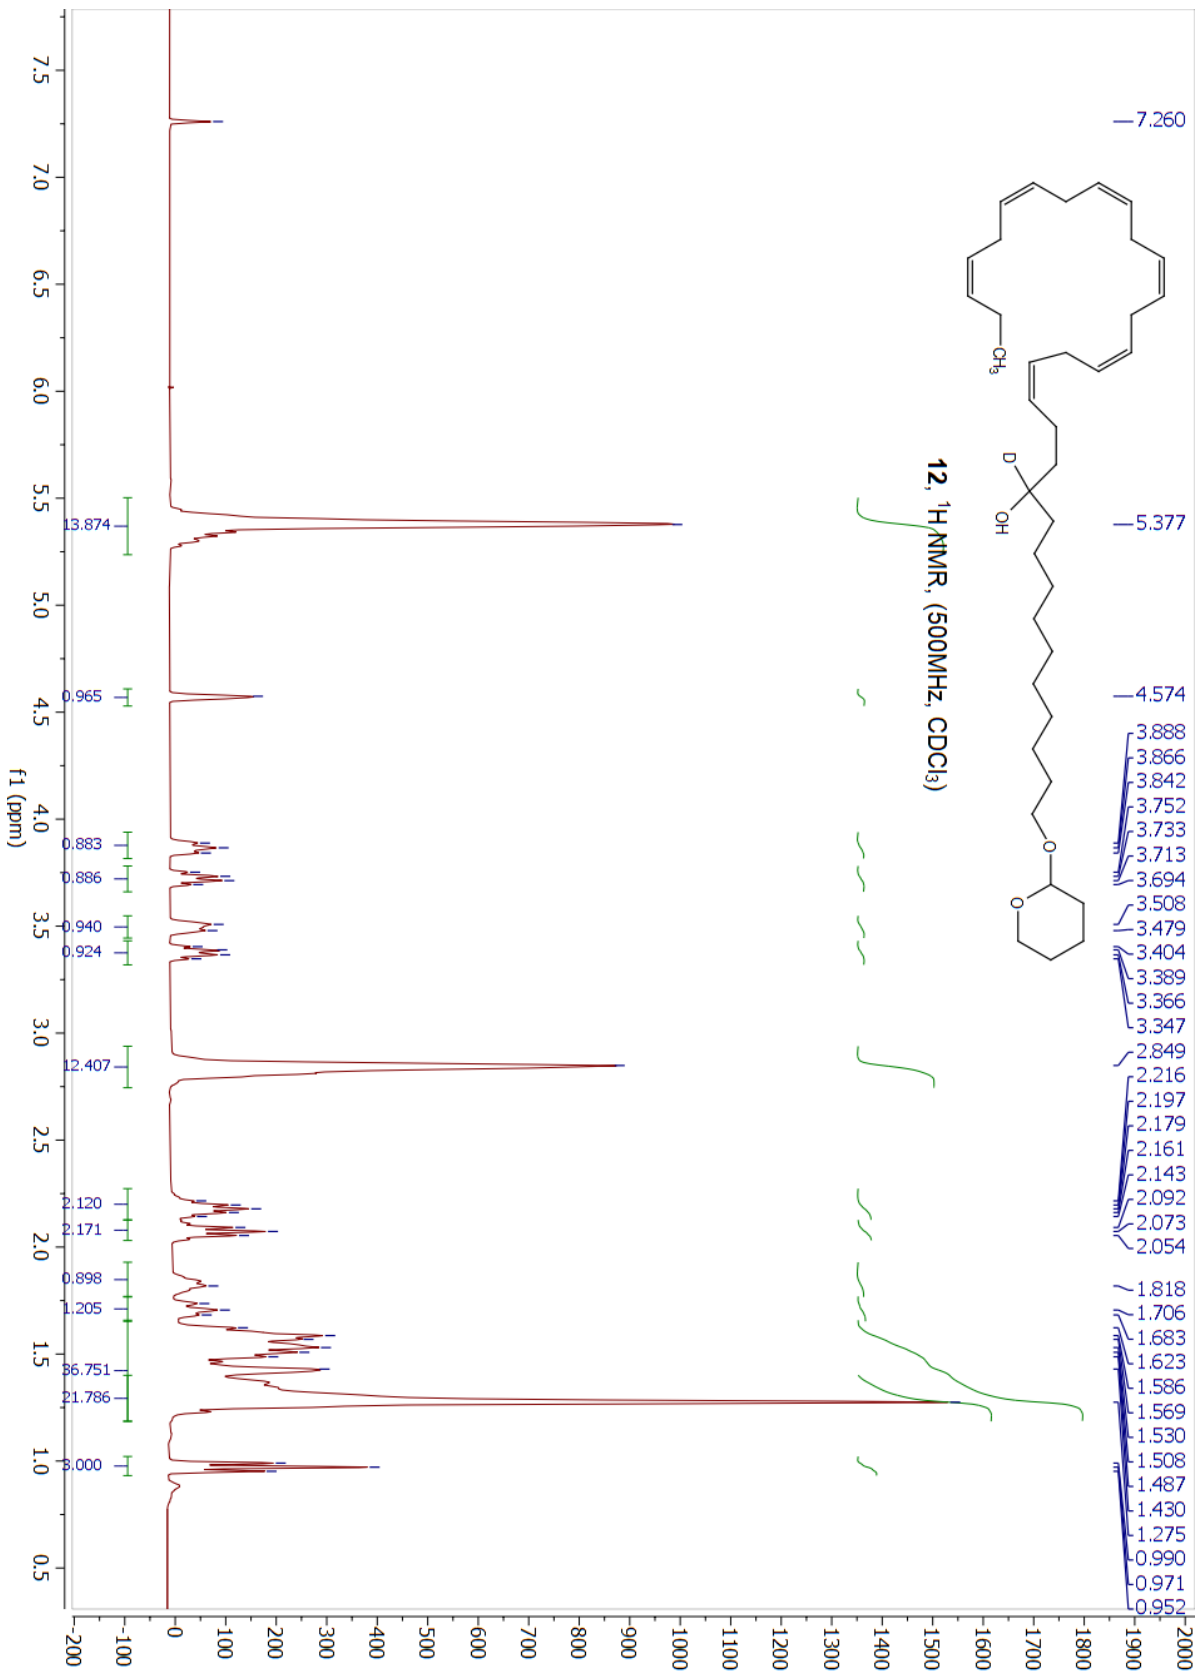



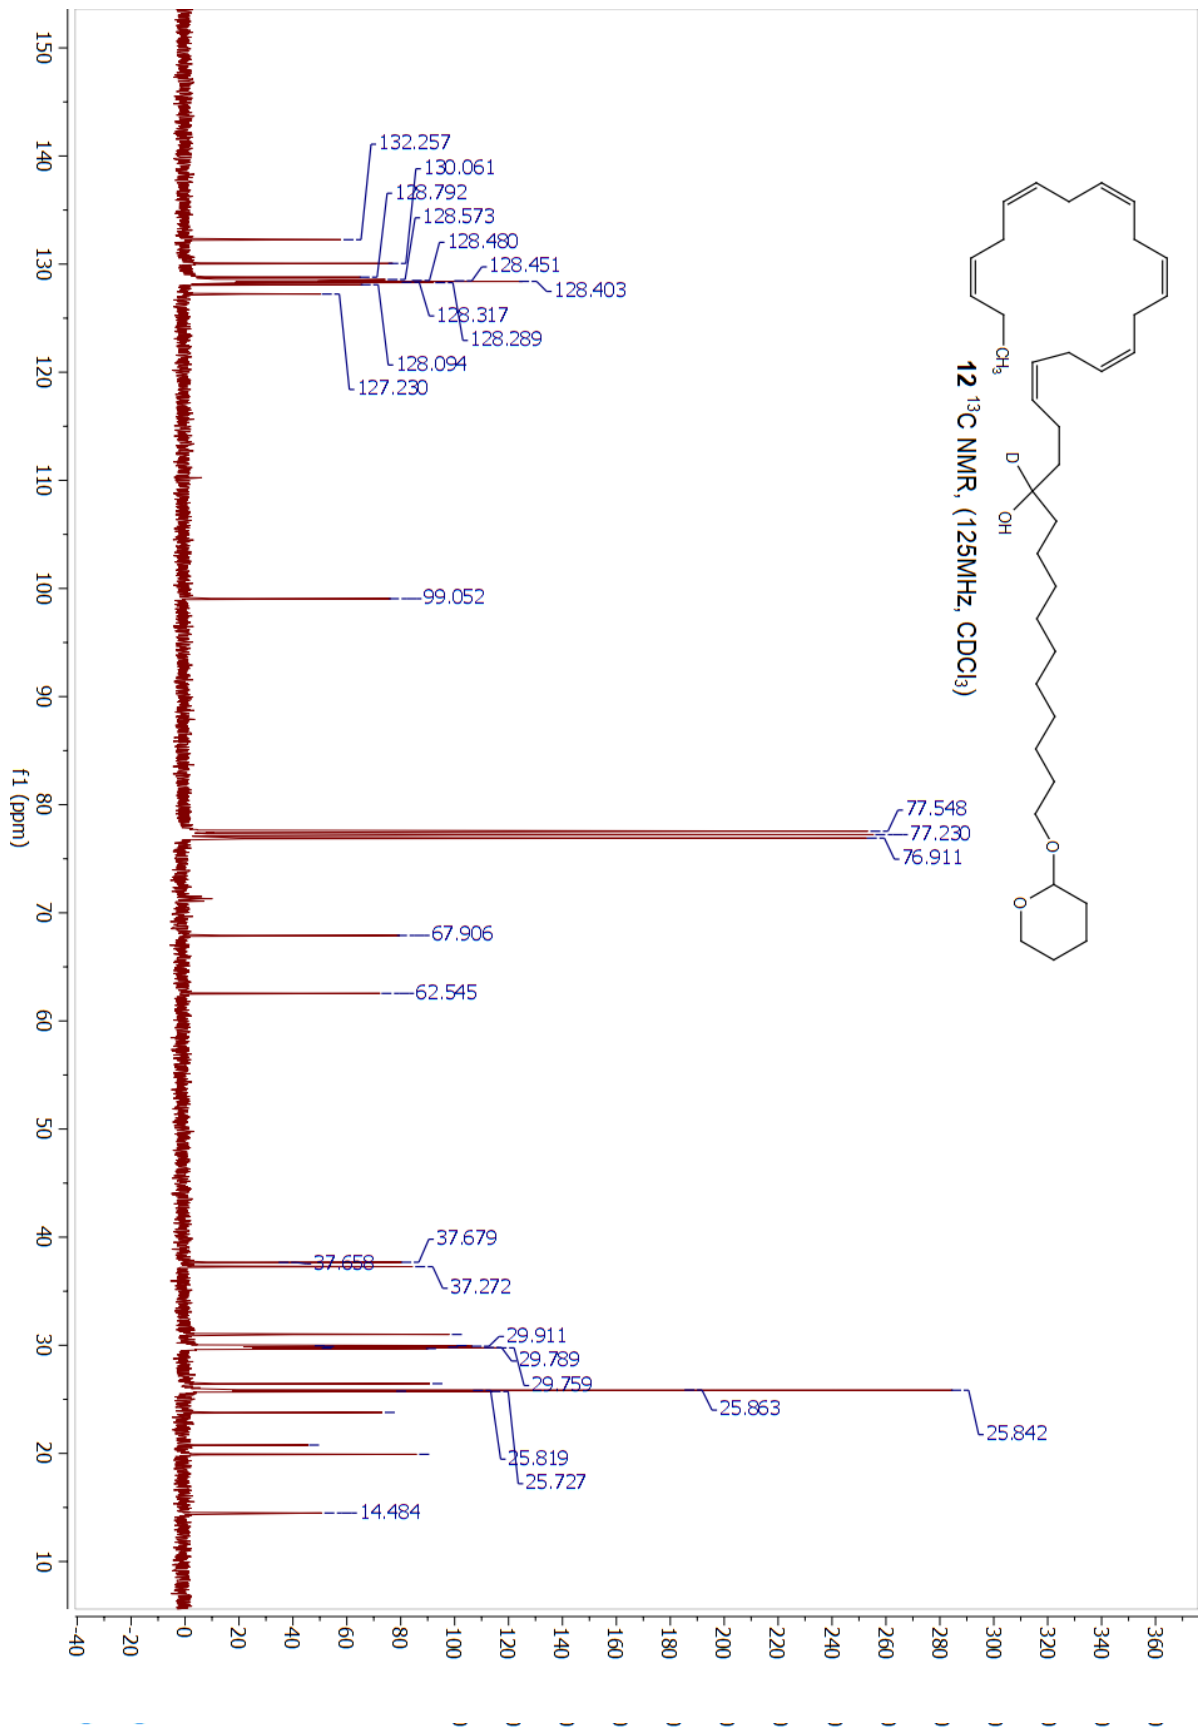

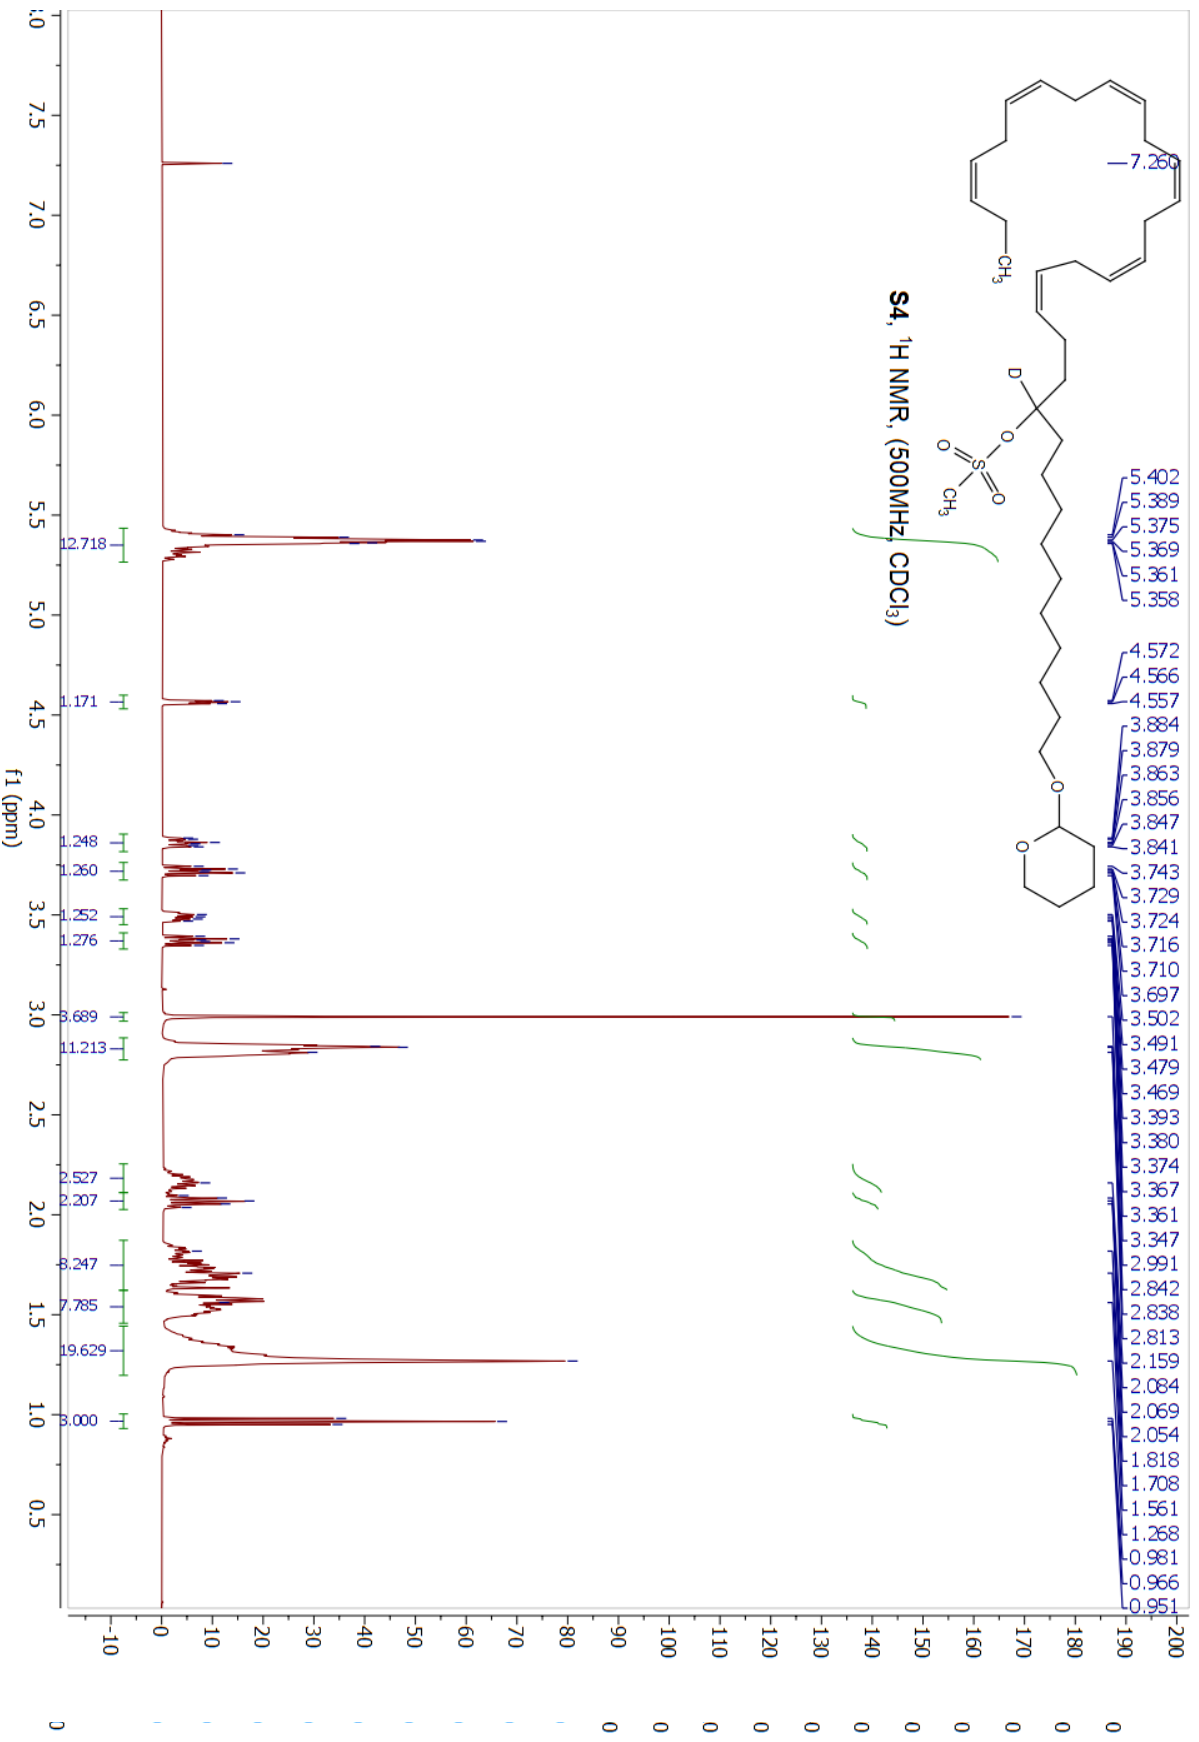

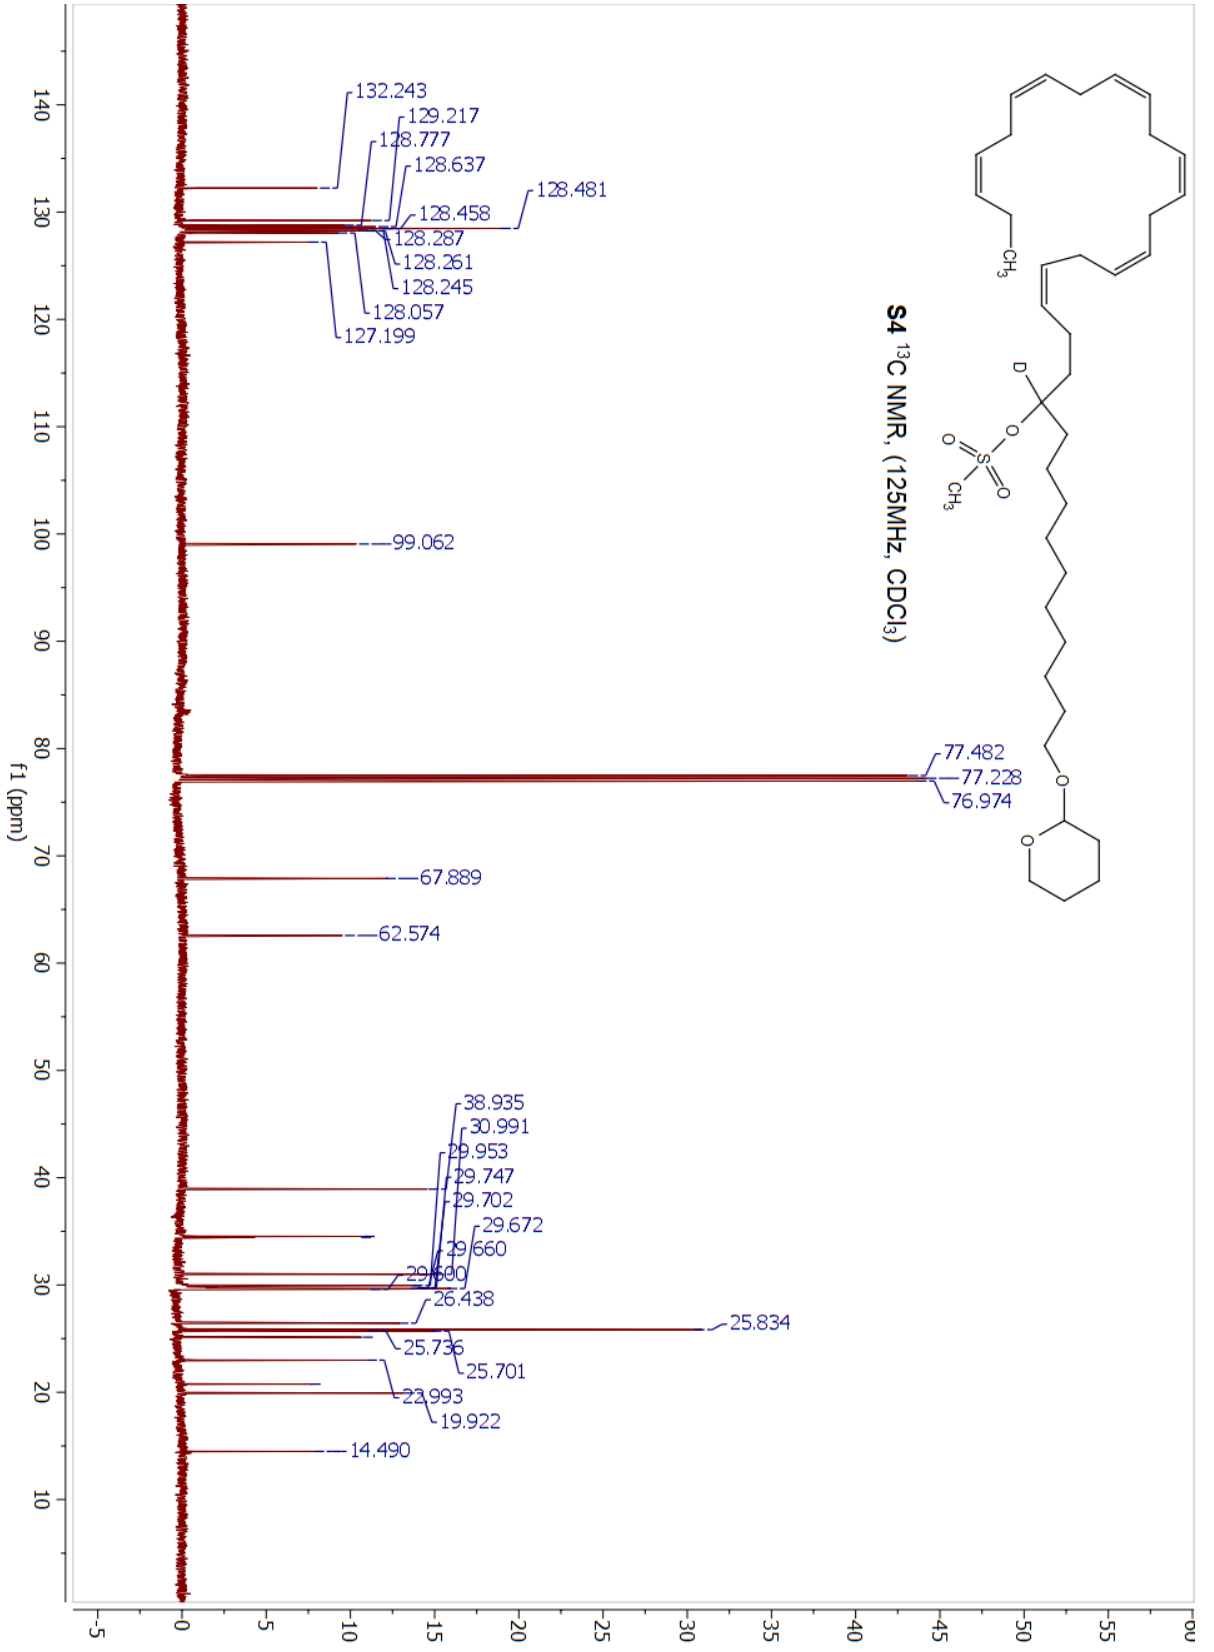

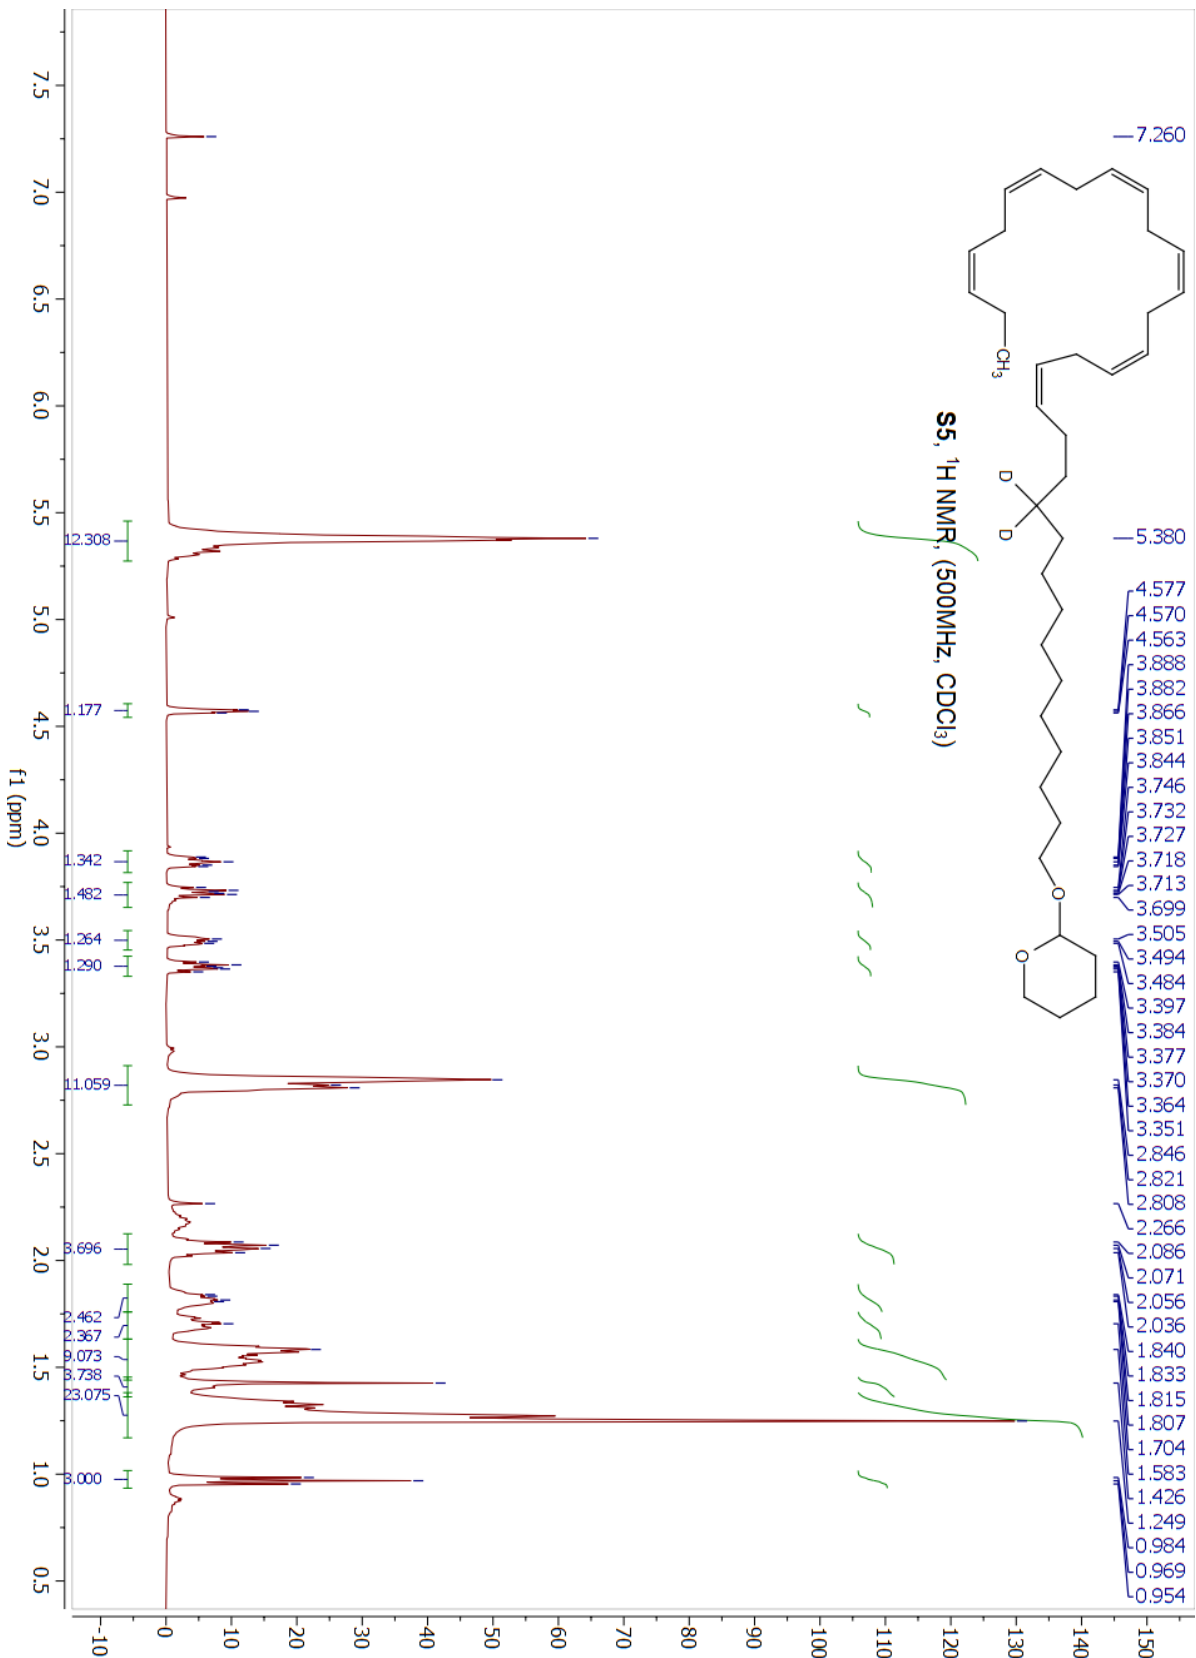



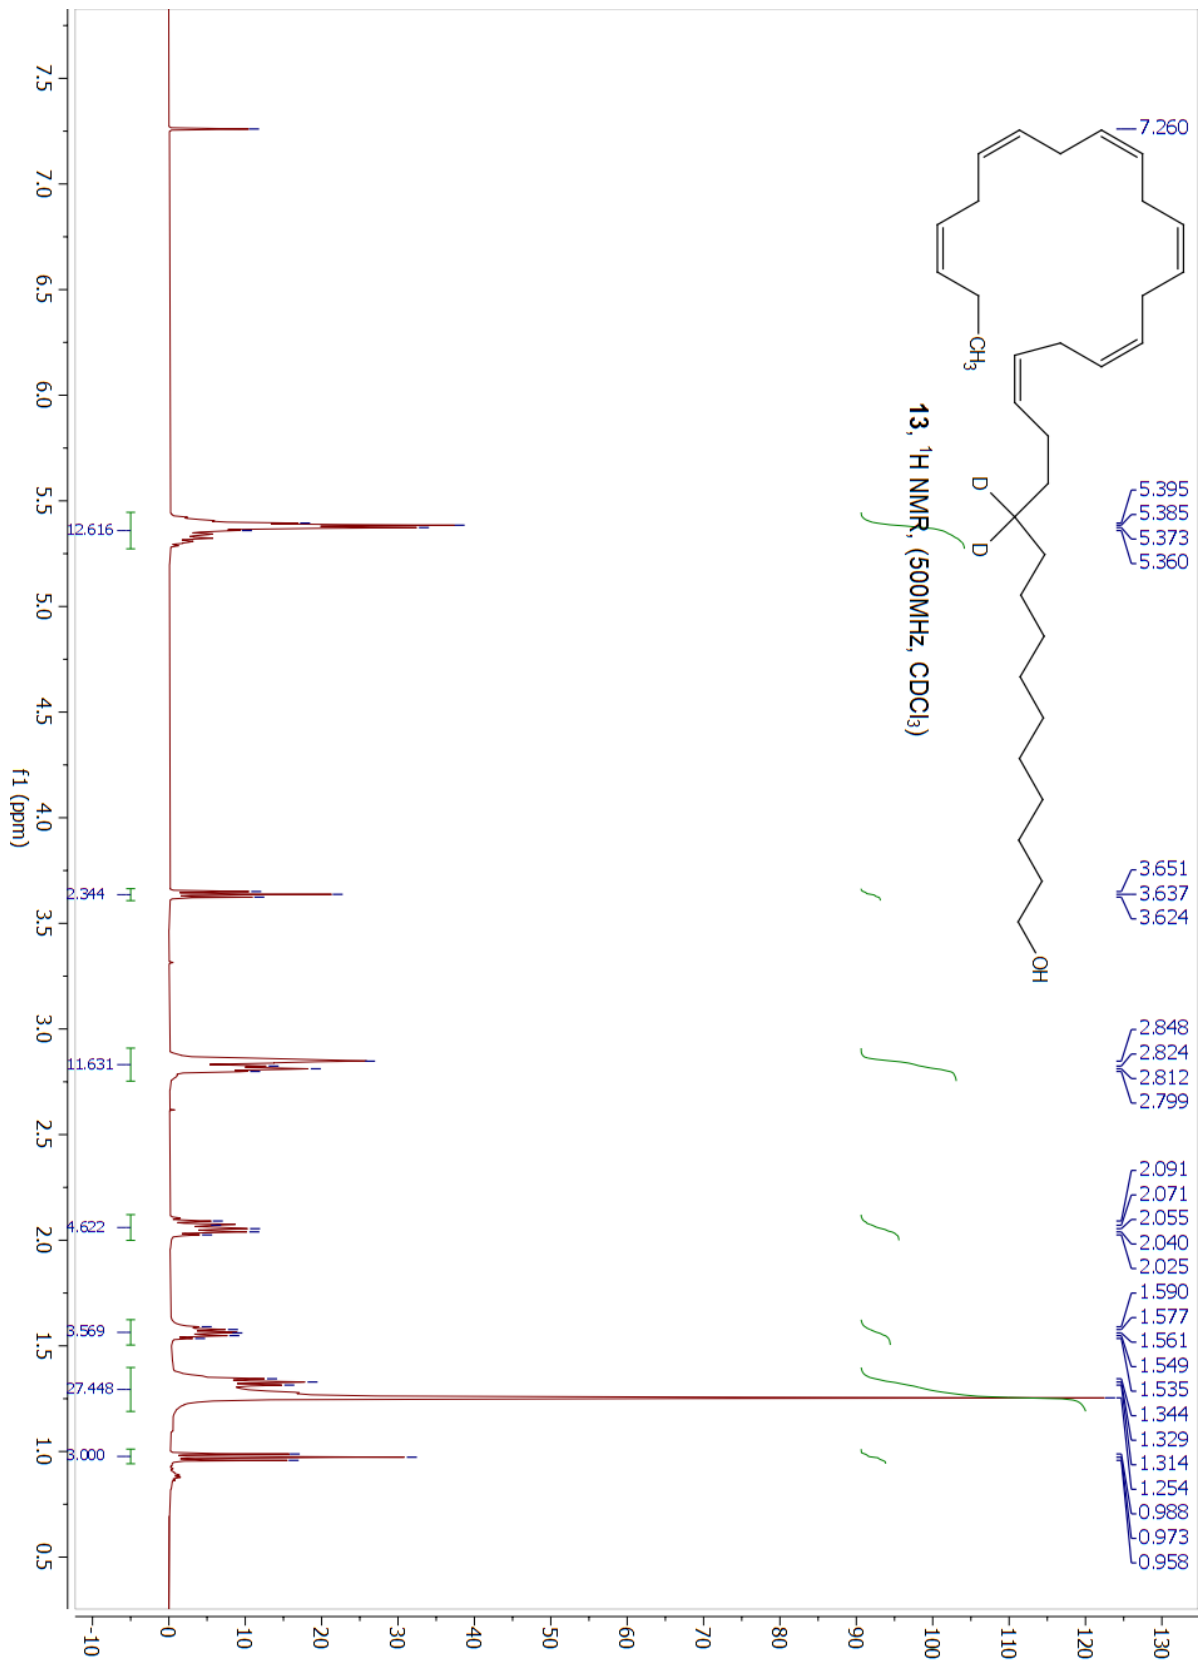

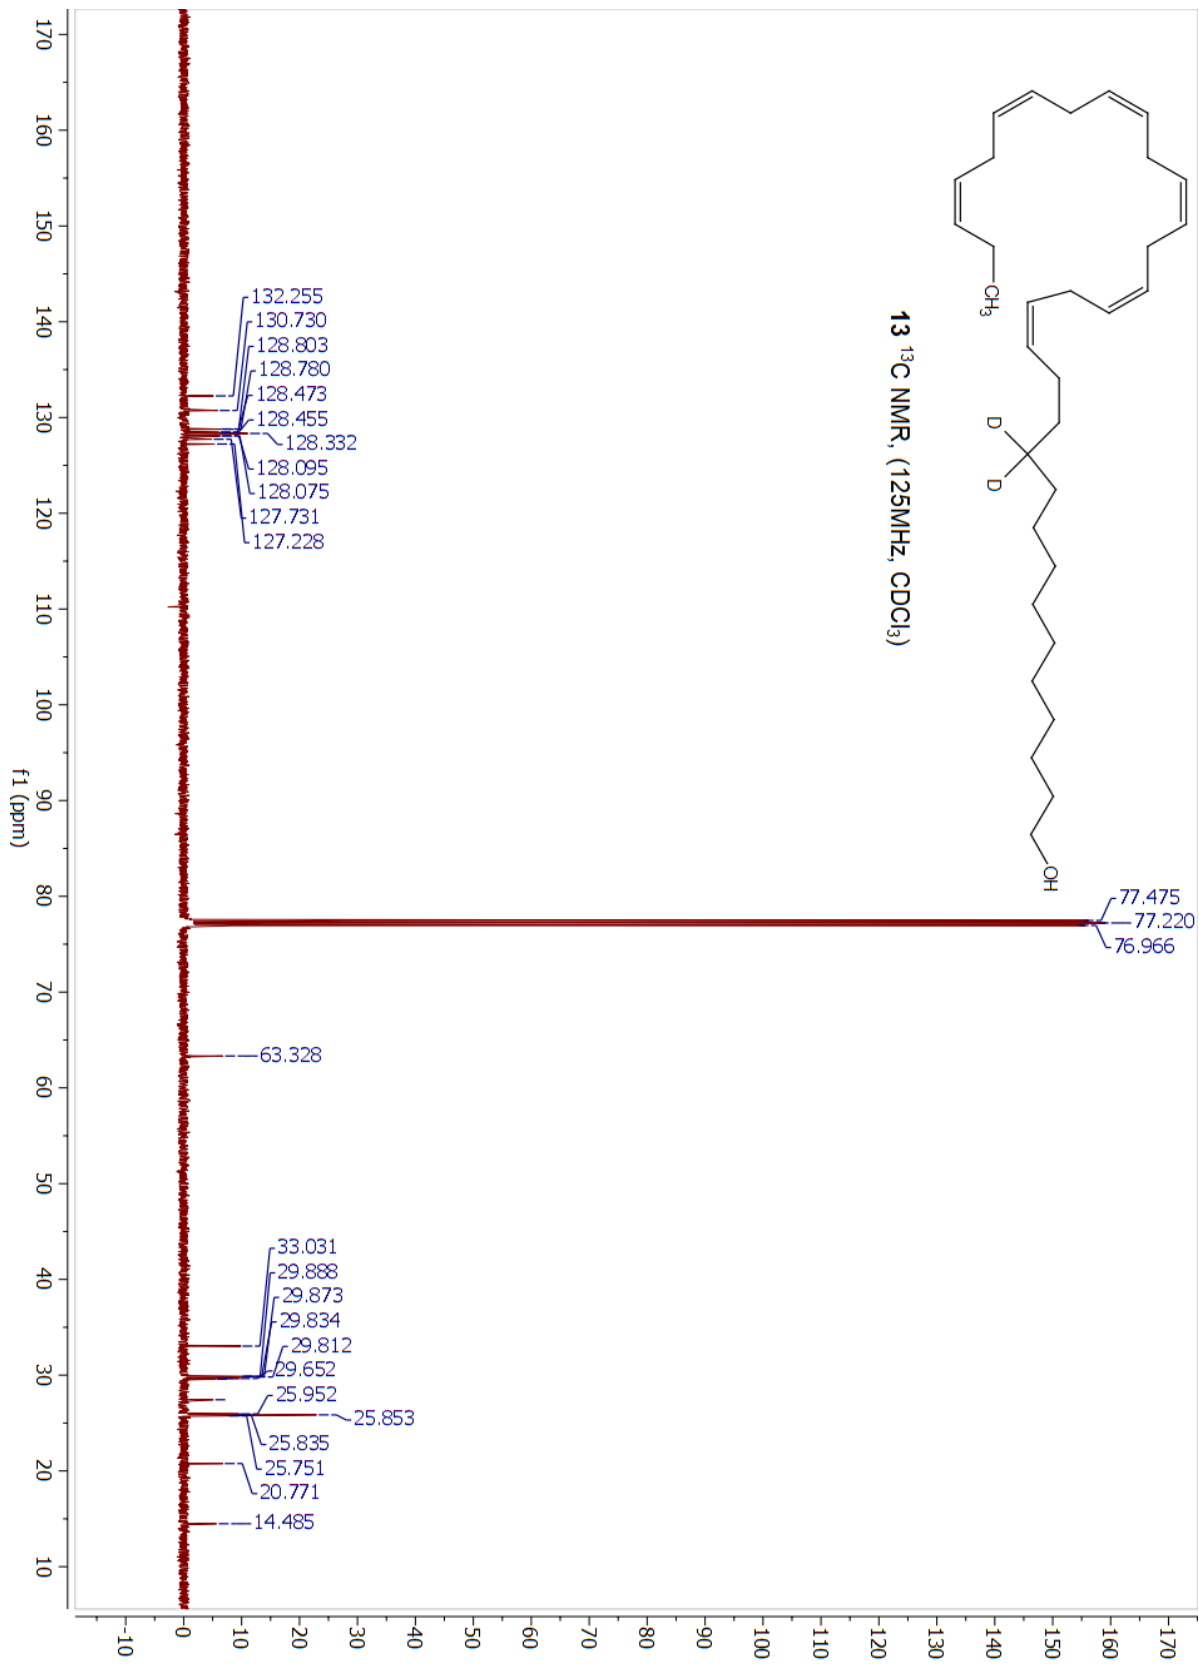

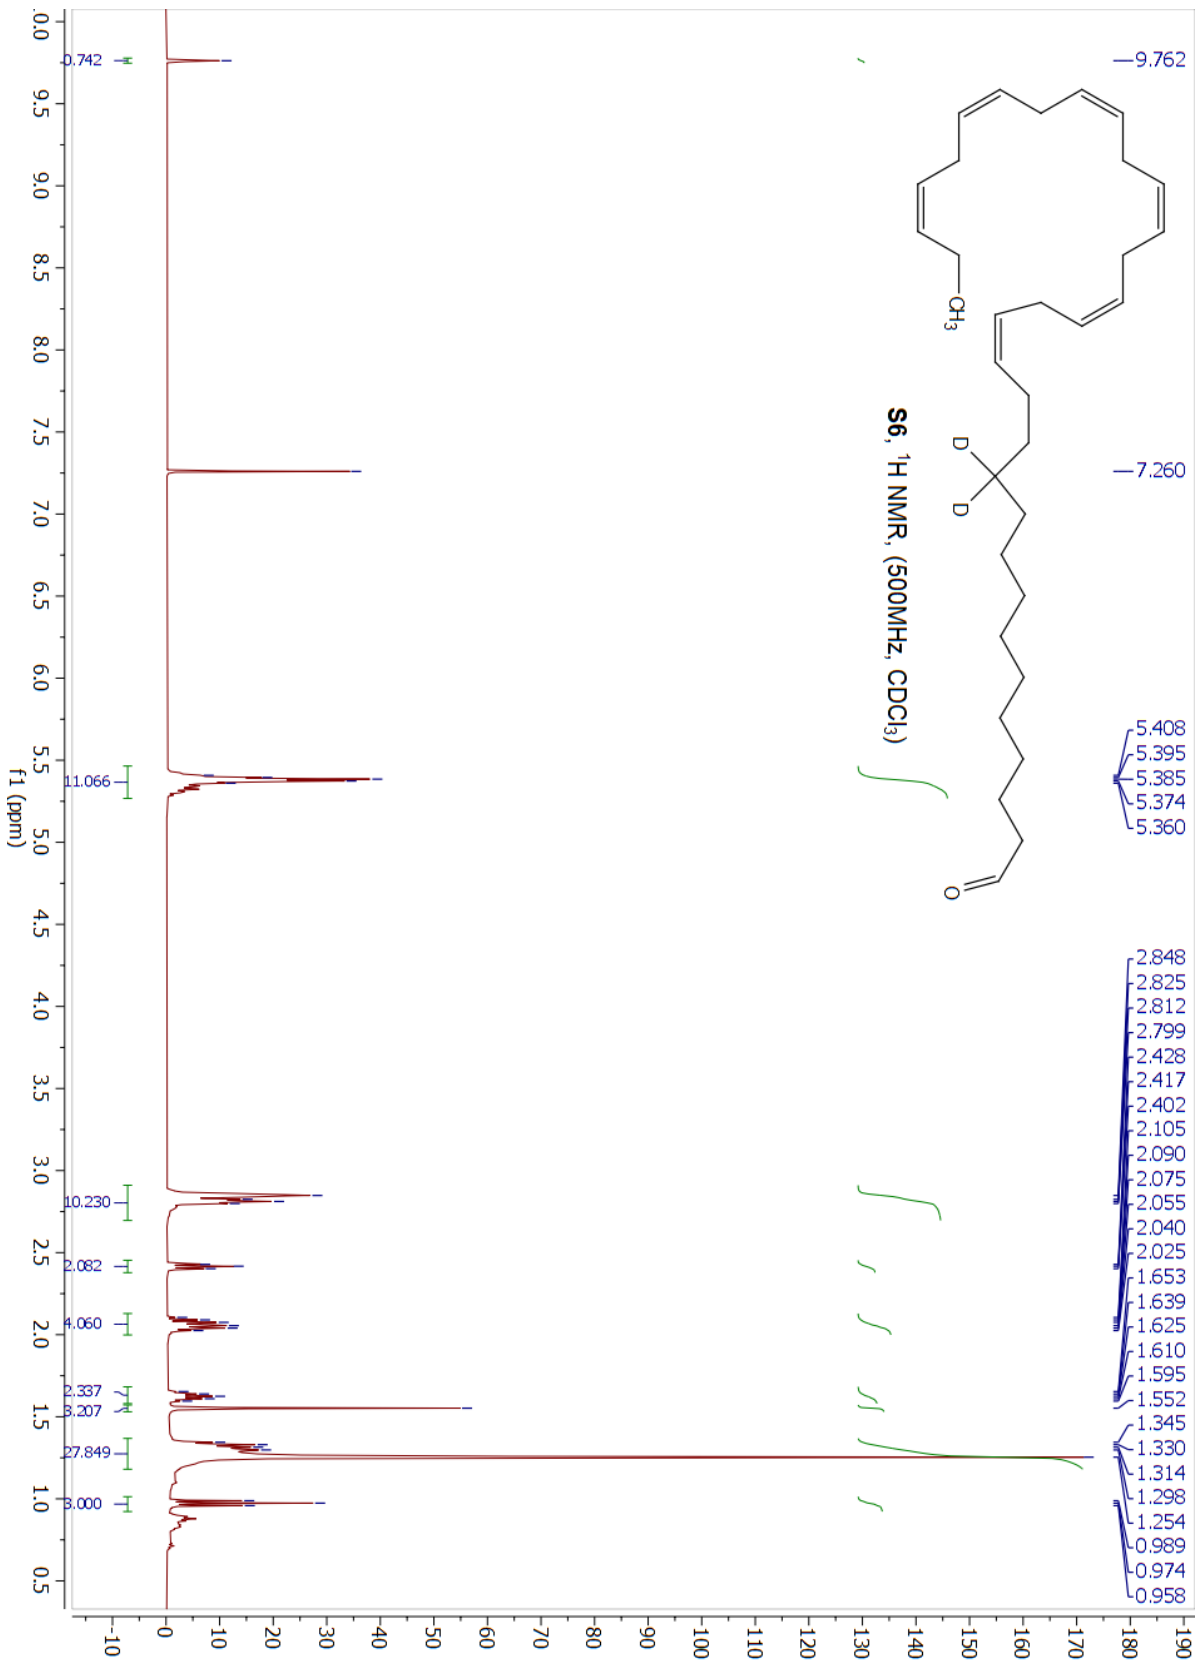



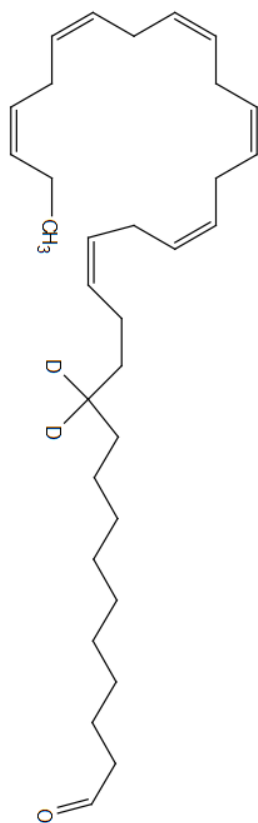

**S6**  $^{13}\text{C}$  NMR, (125MHz,  $\text{CDCl}_3$ )

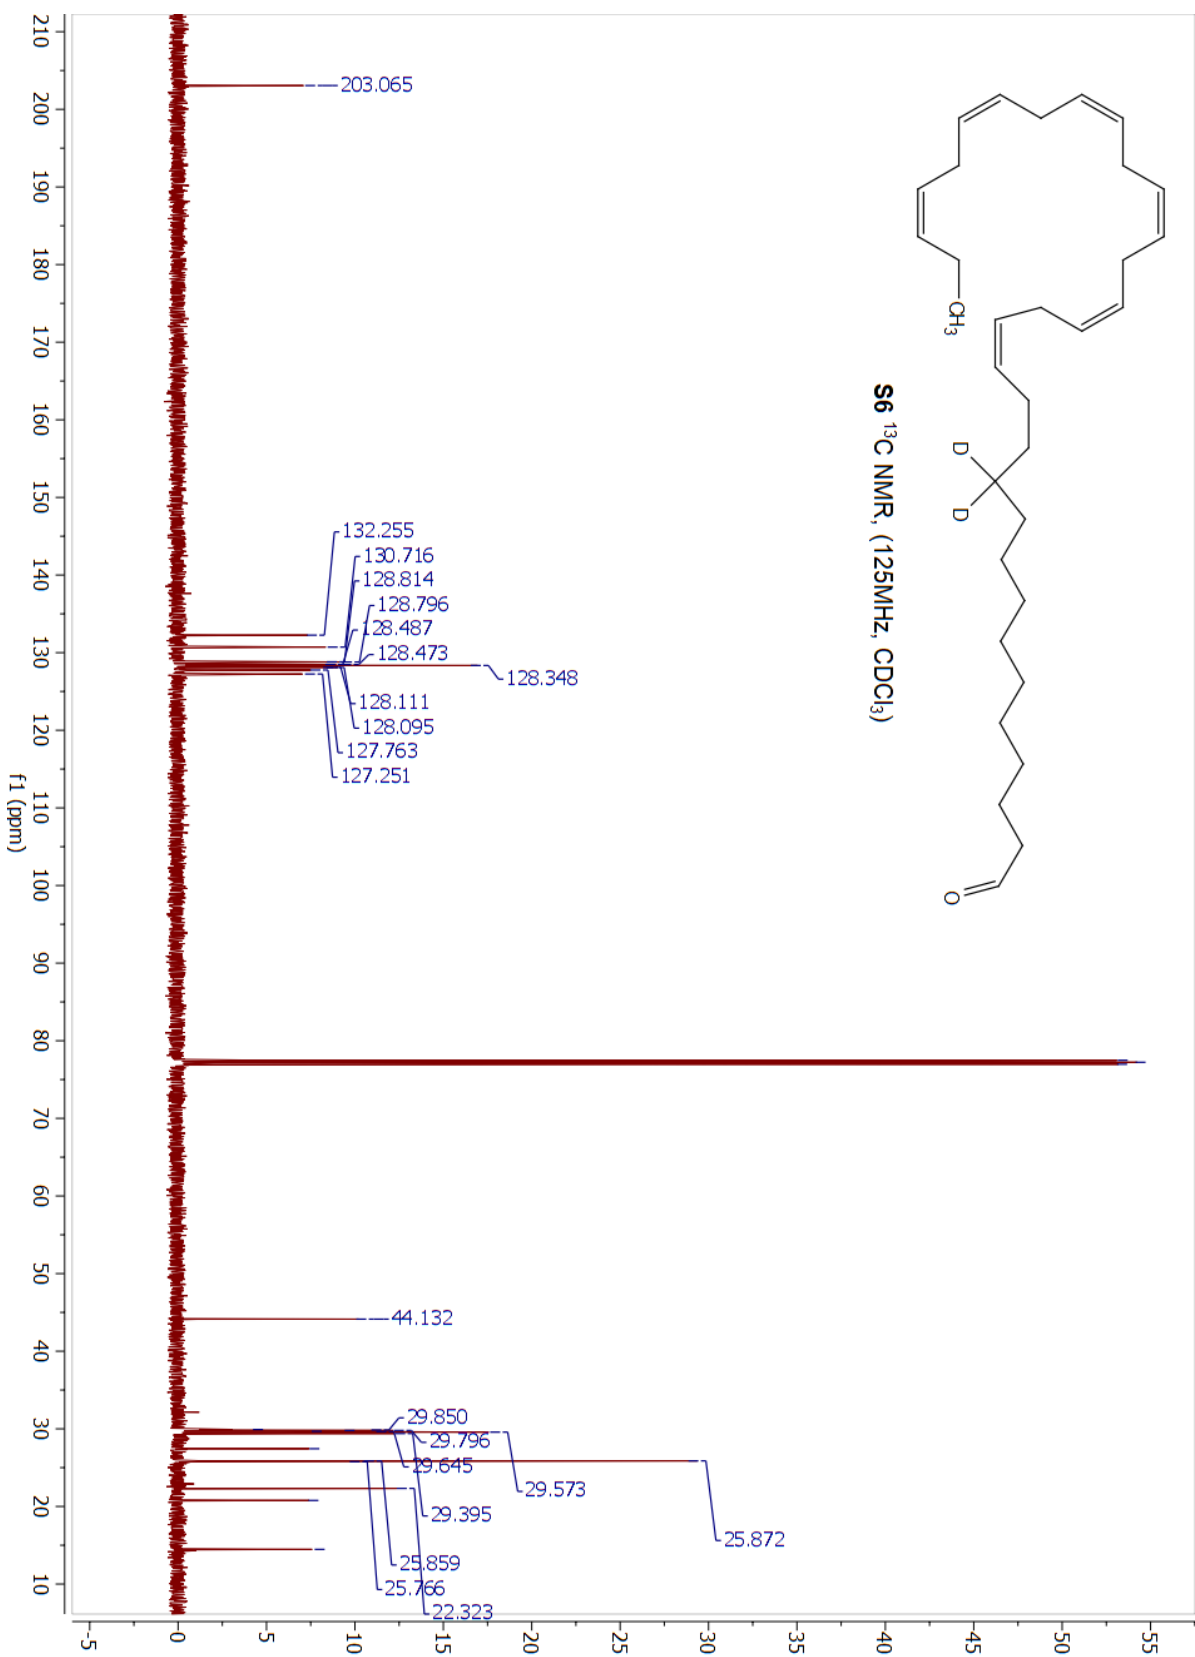

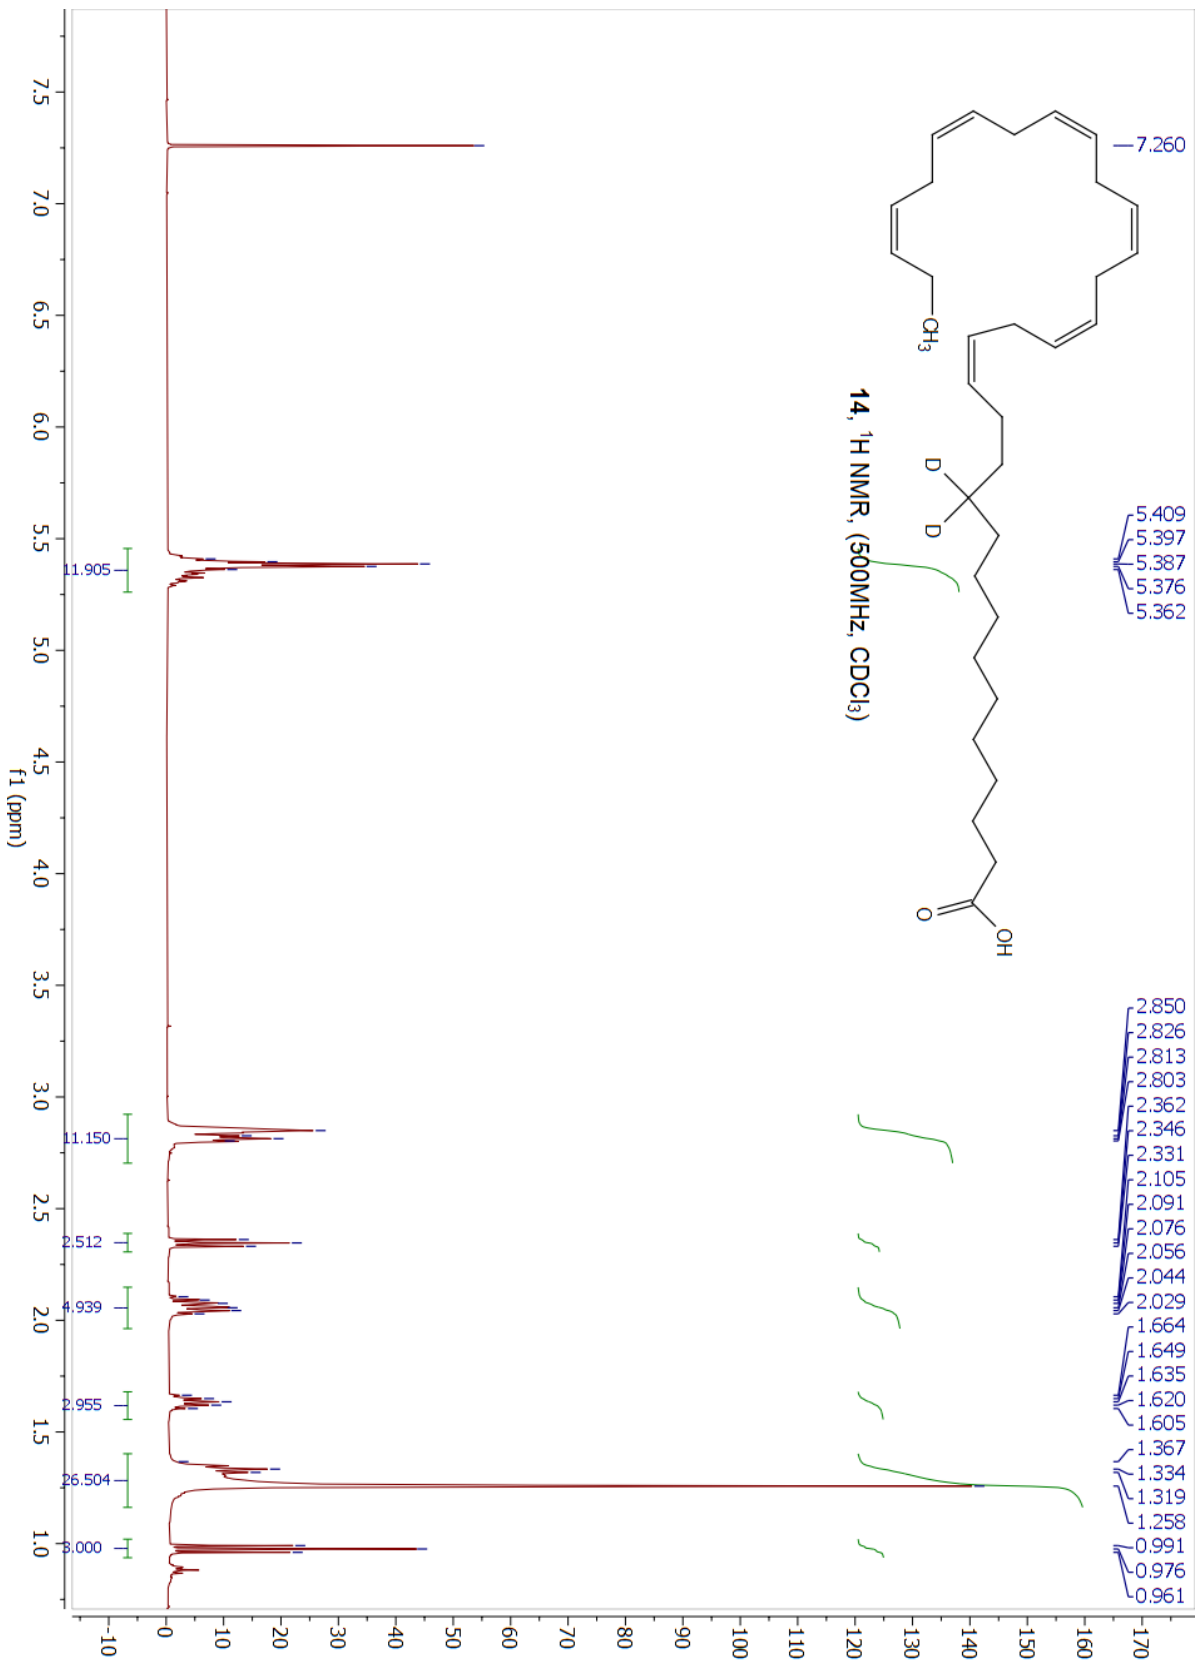

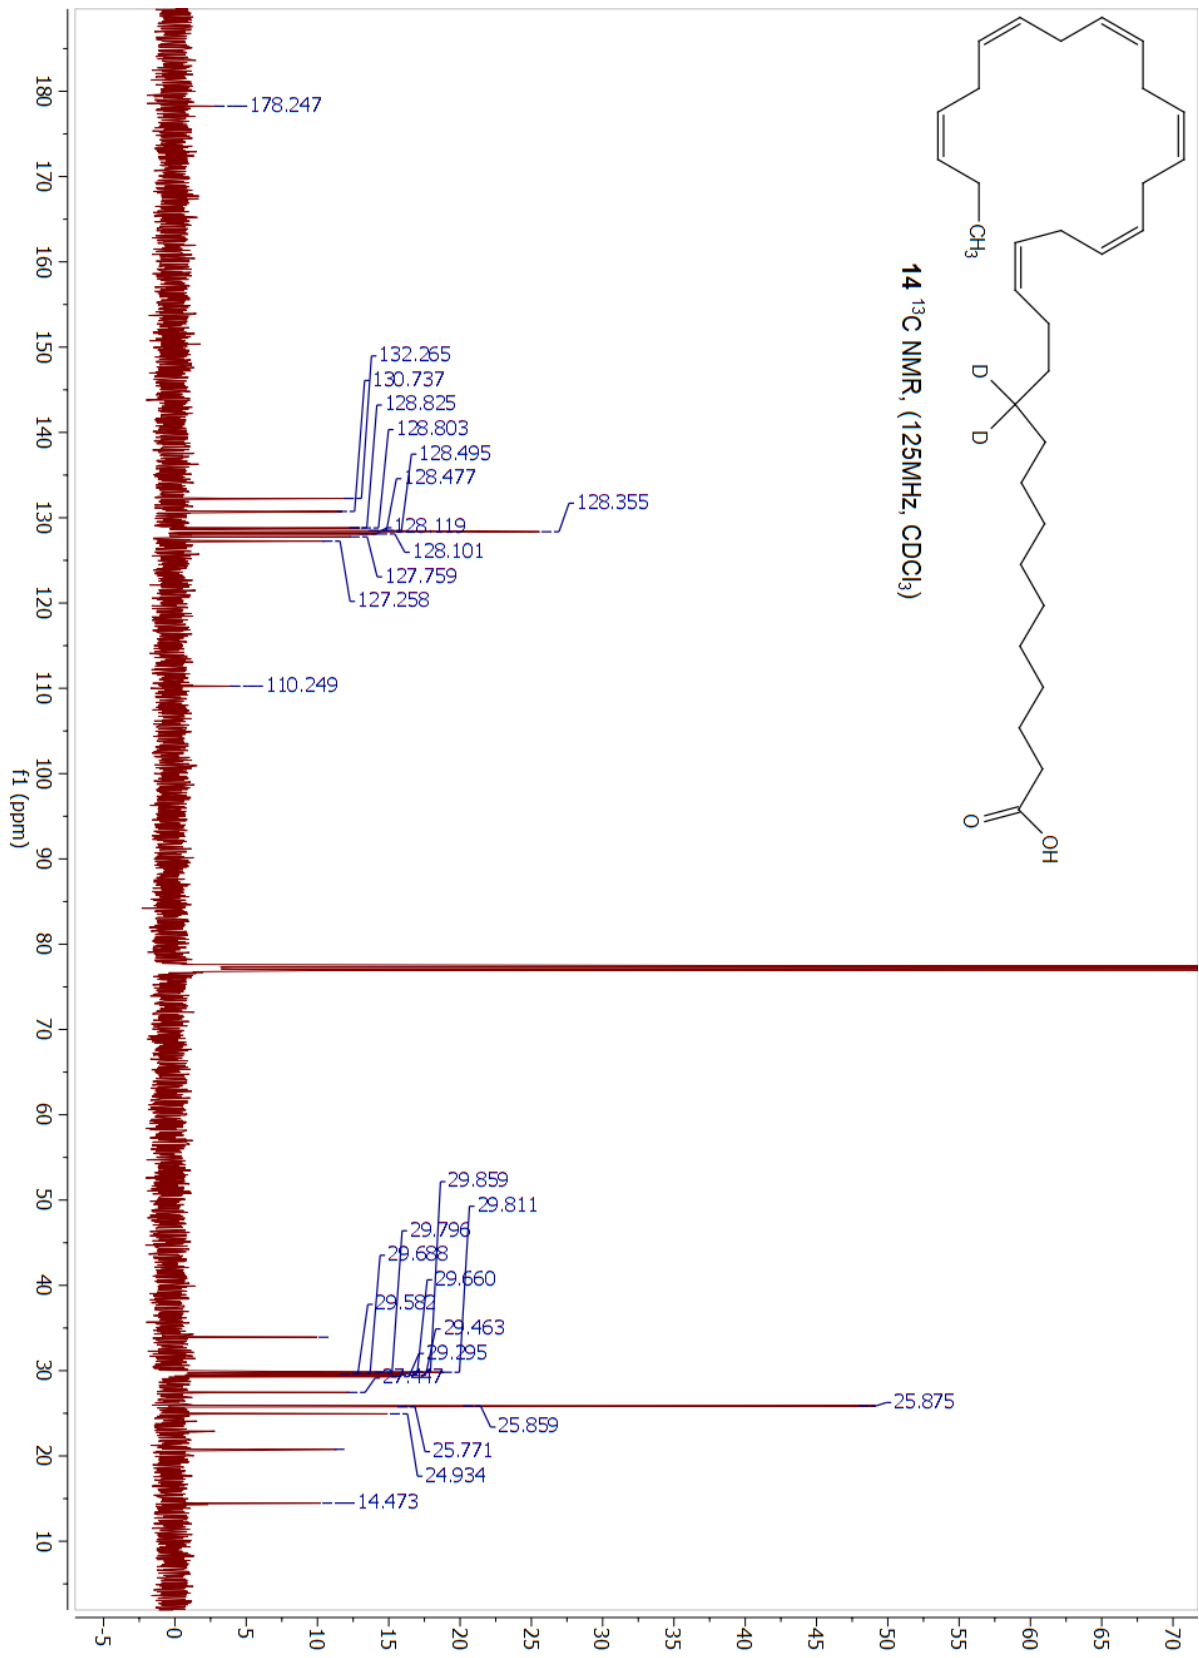

Supplement: d1ob00491c2.pdf [file d1ob00491c2.pdf]
